# Supplementary material for: Revegetation in abandoned quarries with landfill stabilized waste and gravels: water dynamics and plant growth – a case study
Source: Copernicus journal article supplement (doi:10.5194/se-8-1131-2017), 2017-11-02
Supplement: Supplementary file 1 [file se-8-1131-2017-supplement.zip]

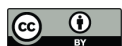

## *Supplement of*

# **Revegetation in abandoned quarries with landfill stabilized waste and gravels: water dynamics and plant growth – a case study**

**Cheng-liang Zhang et al.**

*Correspondence to:* Ting-ning Zhao (zhtning@bjfu.edu.cn)

- se-8-1131-2017-supplement-title-page.pdf
- Supplemental data.xlsx

The copyright of individual parts of the supplement might differ from the CC BY 4.0 License.
