# Supplementary material for: Revegetation in abandoned quarries with landfill stabilized waste and gravels: water dynamics and plant growth – a case study
Source: Copernicus journal article supplement (doi:10.5194/se-8-1131-2017), 2017-11-02
Supplement: Supplementary file 1 [file Supplemental data.xlsx]

## Sheet: Runoff
Date	Precipitation	Surface(mm)					Subsurface(mm)					Sum(mm)
		L1	L2	L3	L4	L5	L1	L2	L3	L4	L5	L1	L2	L3	L4	L5
2013-06-22	4.6	0.012	0.026	0.023	0.003	0.036	0.003	0.007	0.007	0.008	0.006	0.016	0.033	0.03	0.012	0.042
2013-06-24	4.1	0.012	0.018	0.009	0.002	0.027	0	0.002	0.005	0	0.002	0.012	0.019	0.014	0.002	0.029
2013-06-28	30	0.082	0.158	0.198	0.195	0.26	0.171	0.015	0.773	0.538	1.467	0.253	0.173	0.971	0.732	1.727
2013-07-01	19.8	0.123	0.143	0.292	0.248	0.304	0.214	0.023	0.493	3.198	2.595	0.337	0.166	0.785	3.446	2.899
2013-07-02	4.6	0.096	0.041	0.034	0.008	0.018	0.033	0.001	0	0	0.276	0.129	0.042	0.034	0.008	0.294
2013-07-06	5.8	0.002	0.004	0	0.006	0.005	0.001	0	0	0	0	0.003	0.005	0	0.006	0.005
2013-07-10	28.1	0.022	0.019	0.011	0.009	0.01	0.001	0	0	0.001	0	0.022	0.019	0.011	0.01	0.01
2013-07-16	59.2	0.177	0.093	0.144	0.659	0.244	1.982	1.257	1.823	10.223	5.347	2.159	1.35	1.968	10.881	5.591
2013-07-30	11.2	0.036	0.003	0	0.03	0.061	0.033	0.007	0.003	0.007	0.012	0.069	0.01	0	0.036	0.074
2013-08-01	19.3	0.055	0.006	0.138	0.053	0.167	0.009	0.001	0	0	0.729	0.064	0.007	0.138	0.053	0.896
2013-08-04	14.2	0.068	0.002	0.103	0.039	0.051	0.002	0	0	0	0.305	0.069	0.002	0.103	0.039	0.356
2013-08-07	10	0.025	0	0.012	0.028	0.022	0	0	0	0	0.004	0.025	0	0.012	0.028	0.026
2013-08-13	5.8	0.006	0	0.002	0.003	0.002	0	0	0	0.01	0.001	0.006	0	0.002	0.013	0.003
2013-08-20	2	0.001	0	0.001	0.002	0.003	0	0	0	0	0	0.001	0	0.001	0.002	0.003
2013-08-28	34.8	0.083	0.027	0.039	0.255	0.342	0	0	0	0.029	0.118	0.083	0.027	0.039	0.284	0.46
2013-09-05	20	0.037	0.006	0.052	0.065	0.066	0.008	0	0	0.004	0.044	0.045	0.007	0.052	0.068	0.11
2013-09-08	10.6	0.016	0	0.019	0.027	0.02	0	0.009	0	0.005	0.004	0.016	0.009	0.019	0.032	0.024
2013-09-14	7.4	0.022	0.002	0.012	0.01	0.012	0	0	0	0.002	0.001	0.022	0.002	0.012	0.012	0.014
2013-09-19	23.6	0.051	0.019	0.049	0.05	0.05	0	0.006	0	0	0.945	0.051	0.026	0.049	0.05	0.996
2014-05-12	15.2	0.253	0	0.018	0.031	0.027	0.007	0.017	0.009	0.011	0	0.26	0.017	0.028	0.042	0.027
2014-05-19	6.8	0	0	0	0.002	0.005	0.001	0.004	0.001	0.001	0	0.001	0.004	0.001	0.002	0.005
2014-05-24	9	0	0	0.001	0.007	0.005	0	0.004	0	0.002	0	0	0.004	0.001	0.009	0.005
2014-06-02	22.2	0.005	0	0.002	0.006	0.006	0.002	0.002	0	0	0	0.008	0.002	0.002	0.006	0.006
2014-06-07	19.6	0.295	0	0.028	0.034	0.038	0	0	0.011	0.116	0.057	0.295	0	0.039	0.15	0.095
2014-06-13	18	0.023	0	0.008	0.018	0.025	0	0	0	0	0	0.023	0	0.008	0.018	0.025
2014-06-17	8	0.003	0	0.003	0.002	0.008	0	0	0	0	0	0.003	0	0.003	0.002	0.008
2014-07-03	18.8	0	0	0.001	0.001	0.002	0	0	0	0	0	0	0	0.001	0.001	0.002
2014-07-16	39.8	0.125	0.012	0.046	0.255	0.095	0.026	0.704	1.698	3.043	2.082	0.151	0.716	1.744	3.298	2.178
2014-07-30	19.4	0.031	0.047	0.004	0.072	0.039	0.007	0	0.005	0	0.01	0.038	0.047	0.008	0.072	0.049
2014-08-12	6.8	0.009	0	0.002	0.009	0.003	0	0	0	0	0	0.009	0	0.002	0.009	0.003
Note: 2 cases are excluded because of malfunction of the equipment

## Sheet: Physica properties
备注	Porosity (%)	Field capacity (%)
L1	0.47	0.41
L1	0.51	0.45
L1	0.49	0.43
L2	0.37	0.31
L2	0.29	0.23
L2	0.51	0.45
L3	0.31	0.24
L3	0.32	0.26
L3	0.32	0.26
L4	0.39	0.13
L4	0.3	0.17
L4	0.34	0.11
L5	0.41	0.08
L5	0.43	0.08
L5	0.41	0.1

## Sheet: SWC(LGM)
	L1						L2						L3						L4						L5
Date	10cm	20cm	30cm	40cm	50cm	日期	10cm	20cm	30cm	40cm	50cm	日期	10cm	20cm	30cm	40cm	50cm	日期	10cm	20cm	30cm	40cm	50cm	日期	10cm	20cm	30cm	40cm
2013-08-29	9.12	13.13	10.9	8.76	8.2	2013-08-29	8.27	6.31	5.46	5.67	5.41	2013-08-29	8.92	6.28	6.64	6.34	5.72	2013-08-29	5.44	2.92	2.85	3.73	3.02	2013-08-29	2.34	5.07	6.39	6.06
2013-08-30	6.99	11.92	10.97	8.66	8.46	2013-08-30	6.45	5.9	5.34	5.77	5.54	2013-08-30	7.04	6.09	6.81	6.39	5.72	2013-08-30	4.35	2.68	2.92	3.77	4.28	2013-08-30	2.28	4.71	5.75	5.36
2013-08-31	6.04	10.64	10.56	8.72	8.2	2013-08-31	5.34	5.26	4.85	5.59	5.29	2013-08-31	6.25	5.93	6.84	6.5	5.67	2013-08-31	3.69	2.56	2.81	3.77	3.01	2013-08-31	2.09	4.15	5.16	5.09
2013-09-01	5.26	9.81	10.53	8.72	8.24	2013-09-01	4.97	5.02	4.71	5.46	5.26	2013-09-01	5.51	5.82	6.99	6.61	5.69	2013-09-01	3.34	2.43	2.8	3.71	2.97	2013-09-01	2.16	4.04	4.8	4.64
2013-09-02	4.8	9.29	10.27	8.59	8.08	2013-09-02	4.35	4.69	4.64	5.39	5.21	2013-09-02	4.92	5.59	6.81	6.64	5.8	2013-09-02	3.19	2.5	2.92	3.81	3.04	2013-09-02	2	3.73	4.37	4.15
2013-09-03	4.69	8.95	9.99	7.83	7.4	2013-09-03	3.88	4.39	4.39	5.31	5.34	2013-09-03	4.55	5.57	6.76	6.64	5.75	2013-09-03	3.01	2.34	2.8	3.75	2.99	2013-09-03	1.96	3.45	4.02	3.94
2013-09-04	13.46	15.49	12.88	9.39	8.59	2013-09-04	10.75	6.7	5.21	5.64	5.51	2013-09-04	12.48	7.31	7.49	6.9	5.72	2013-09-04	5.24	2.34	2.85	3.83	4.28	2013-09-04	3.13	5.9	7.67	7.19
2013-09-06	11.81	15.99	13.75	9.36	8.46	2013-09-06	10.13	7.25	5.31	5.8	5.64	2013-09-06	10.53	9.12	8.46	6.81	5.75	2013-09-06	5.82	2.58	2.85	3.88	3.08	2013-09-06	2.88	5.21	6.61	6.23
2013-09-07	10.13	15.09	13.54	9.22	8.24	2013-09-07	8.76	6.99	5.24	5.75	5.49	2013-09-07	9.33	9.19	8.82	6.96	5.64	2013-09-07	5.44	2.61	2.88	3.88	3.08	2013-09-07	2.56	4.76	6.14	5.67
2013-09-08	9.26	14.39	13.58	8.85	7.34	2013-09-08	7.52	6.96	5.41	5.72	5.59	2013-09-08	8.36	8.76	9.19	7.13	5.72	2013-09-08	4.95	2.6	2.85	3.85	3.06	2013-09-08	2.5	4.66	5.85	5.29
2013-09-10	10.64	15.76	14.78	9.85	8.56	2013-09-10	8.79	7.22	5.54	5.64	5.57	2013-09-10	11.01	10.09	9.95	7.31	5.8	2013-09-10	5.54	2.75	2.87	3.9	3.1	2013-09-10	2.55	5.02	6.61	6.28
2013-09-14	9.57	14.3	14.61	9.43	8.3	2013-09-14	7.55	6.67	5.46	5.59	5.54	2013-09-14	9.95	9.74	10.45	8.01	5.9	2013-09-14	5.04	2.78	2.99	4.02	3.13	2013-09-14	3.02	5.44	6.81	6.06
2013-09-15	8.36	14.17	15.04	10.67	9	2013-09-15	6.34	6.01	5.21	5.85	5.77	2013-09-15	8.99	9.46	10.53	8.2	5.93	2013-09-15	4.8	2.83	3.06	4	3.11	2013-09-15	2.69	4.92	6.2	5.59
2013-09-25	10.49	16.63	16.96	11.61	8.76	2013-09-25	8.4	7.25	5.88	5.77	5.46	2013-09-25	11.04	11.42	13.92	11.73	7.02	2013-09-25	6.06	3.47	3.83	4.62	3.26	2013-09-25	2.45	4.83	6.53	6.09
2013-09-26	9.57	16.4	17	11.85	9.02	2013-09-26	7.61	6.9	5.8	5.8	5.49	2013-09-26	9.99	10.97	13.71	12.08	7.34	2013-09-26	5.72	3.47	3.96	4.85	5.26	2013-09-26	2.66	4.8	6.25	5.49
2013-09-27	9.36	16.12	16.86	11.92	9.02	2013-09-27	7.25	7.13	5.77	5.85	5.49	2013-09-27	9.5	10.49	13.62	12.04	7.58	2013-09-27	5.49	3.42	4.02	4.95	3.4	2013-09-27	2.66	4.76	6.17	5.46
2013-09-28	8.66	15.5	16.08	10.71	8.53	2013-09-28	6.7	6.67	5.8	6.09	5.64	2013-09-28	8.79	10.27	13.42	12.28	7.8	2013-09-28	5.31	3.45	4.22	5.14	3.49	2013-09-28	2.53	4.55	5.59	4.95
2013-10-01	9.53	16.22	16.58	11.89	9.57	2013-10-01	6.9	6.9	5.96	6.06	5.59	2013-10-01	8.89	9.74	12.88	12	8.3	2013-10-01	5.12	3.43	4.17	5.19	3.59	2013-10-01	3.1	5.29	5.67	4.17
2013-10-10	5.88	12.72	15.44	12.64	9.85	2013-10-10	4.37	5.24	5.29	5.88	5.49	2013-10-10	5.9	7.89	10.64	10.78	8.17	2013-10-10	3.85	2.94	3.88	5.04	3.63	2013-10-10	2.18	3.67	4.39	3.43
2013-10-11	5.46	11.96	15.04	12.76	10.31	2013-10-11	4.13	5.04	5.19	5.67	5.39	2013-10-11	5.34	7.28	9.92	10.71	8.4	2013-10-11	3.55	2.68	3.65	4.85	3.53	2013-10-11
2013-10-12	5.31	11.58	14.48	12.48	9.99	2013-10-12	3.9	4.76	5.04	5.9	5.51	2013-10-12	5.21	6.96	9.78	10.64	8.36	2013-10-12	3.49	2.78	3.75	4.95	3.57	2013-10-12	2.07	3.49	4.13	3.21
2013-10-13	5.21	11.42	14.65	12.6	10.02	2013-10-13	3.77	4.57	4.99	5.59	5.41	2013-10-13	4.92	6.42	9.16	10.31	8.36	2013-10-13	3.36	2.64	3.57	4.73	3.42	2013-10-13	2.06	3.4	3.96	3.04
2013-10-17	4.76	9.95	12.52	10.31	8.66	2013-10-17						2013-10-17	3.96	5.26	7.46	9.09	7.83	2013-10-17						2013-10-17
2013-10-18	4.76	10.09	12.6	10.6	8.85	2013-10-18						2013-10-18	3.94	5.16	7.25	9.02	7.73	2013-10-18						2013-10-18
2013-10-19	4.69	9.74	12.2	11.04	8.72	2013-10-19						2013-10-19	3.79	5.04	7.04	8.72	7.58	2013-10-19						2013-10-19
2013-10-24	4.3	9.53	12.12	10.71	8.95	2013-10-24						2013-10-24	3.28	4.5	6.34	8.17	7.25	2013-10-24						2013-10-24
2013-10-25	4.44	9.33	11.61	10.64	8.95	2013-10-25						2013-10-25	3.19	4.53	6.2	8.2	7.31	2013-10-25						2013-10-25
2013-10-29	4	9.06	11.54	10.02	8.33	2013-10-29						2013-10-29	3.01	4.22	5.82	7.46	6.9	2013-10-29						2013-10-29
2013-11-05	4.15	8.92	10.9	9.06	7.64	2013-11-05						2013-11-05	2.64	3.9	5.59	6.96	6.42	2013-11-05						2013-11-05	1.6	2.43	2.66	2.03
2013-12-10	3.28	8.11	9.92	8.36	7.34	2013-12-10						2013-12-10	1.76	3.65	5.44	6.42	5.69	2013-12-10	2.51	1.99	2.64	3.73	2.99	2013-12-10	1.29	2.3	2.78	2.1
2014-01-18	2.92	7.07	8.72	8.08	7.22	2014-01-18						2014-01-18	1.52	3.21	4.62	5.12	4.71	2014-01-18	2.19	1.81	2.28	3.4	2.8	2014-01-18	1.38	2.12	2.53	1.99
2014-02-23	2.95	8.59	9.6	7.95	7.07	2014-02-23						2014-02-23	1.51	3.23	5.16	5.85	5.24	2014-02-23	2.3	1.84	2.68	3.55	2.76	2014-02-23	1.49	2.18	2.99	2.22
2014-03-05	2.9	8.36	9.99	8.59	7.49	2014-03-05						2014-03-05	1.4	3.11	5.07	5.75	5.14	2014-03-05	2.31	1.89	2.55	3.57	2.85	2014-03-05	1.33	2.03	2.68	2.02
2014-03-17	2.85	8.59	10.45	9.19	8.11	2014-03-17						2014-03-17	1.41	3.15	5.21	5.88	5.31	2014-03-17	2.36	1.99	2.63	3.63	4.06	2014-03-17	1.29	1.96	2.53	1.89
2014-03-25	2.88	8.92	10.97	9.33	8.36	2014-03-25						2014-03-25	1.42	3.19	5.31	6.04	5.49	2014-03-25	2.34	2.03	2.61	3.59	2.92	2014-03-25	1.51	2.07	2.61	1.68
2014-04-05	2.81	8.89	11.04	8.99	7.55	2014-04-05						2014-04-05	1.29	2.97	5.26	5.9	5.44	2014-04-05	2.26	1.97	2.55	3.53	4.11	2014-04-05	1.34	1.91	2.5	1.8
2014-04-15	2.87	8.82	11.16	9.88	8.76	2014-04-15						2014-04-15	1.42	3.04	5.09	5.82	5.36	2014-04-15	2.16	1.99	2.51	3.53	2.88	2014-04-15	1.42	1.92	2.34	1.79
2014-04-26	3.47	8.66	10.97	9.5	8.27	2014-04-26						2014-04-26	1.51	2.92	5.04	5.69	5.21	2014-04-26	2.2	1.92	2.45	3.47	2.83	2014-04-26	2.02	2.63	2.39	1.73
2014-05-05	2.76	8.53	10.82	9.39	8.17	2014-05-05						2014-05-05	1.15	2.53	4.78	5.44	5.19	2014-05-05	2.03	1.88	2.42	3.4	2.8	2014-05-05	1.45	1.91	2.25	1.61
2014-05-09	2.66	8.46	10.86	9.57	8.36	2014-05-09						2014-05-09	1.4	2.73	5.04	5.69	5.24	2014-05-09	2.07	1.92	2.45	3.45	2.8	2014-05-09	1.51	2	2.16	1.55
2014-05-12	8.14	8.82	10.56	8.92	7.8	2014-05-12						2014-05-12	7.43	3.19	5.02	5.64	5.34	2014-05-12	3.06	1.97	2.51	3.47	4	2014-05-12	2.66	4.6	5.31	2.76
2014-05-13	8.11	9.16	10.78	9.16	7.95	2014-05-13	7.28	2.88	3.45	4.35	4.41	2014-05-13	6.56	3.49	5.04	5.59	5.26	2014-05-13	3.45	2.04	2.5	3.45	2.75	2014-05-13	2.4	4.44	4.78	2.39
2014-05-14	7.46	9.19	10.24	8.76	7.58	2014-05-14	6.73	2.85	3.32	4.13	4.19	2014-05-14	5.62	3.43	4.9	5.57	5.14	2014-05-14	3.3	1.96	2.42	3.34	2.73	2014-05-14	2.07	3.92	4.39	2.18
2014-05-15	7.1	8.85	10.45	8.82	7.7	2014-05-15						2014-05-15	5.44	3.61	4.92	5.44	5.12	2014-05-15	3.4	1.99	2.42	3.43	2.8	2014-05-15	1.99	3.73	4.13	2.1
2014-05-17	6.84	9.36	10.6	8.82	8.17	2014-05-17						2014-05-17	4.85	3.9	4.95	5.39	5.19	2014-05-17	3.34	1.99	2.45	3.47	2.83	2014-05-17	1.75	3.47	3.85	2.09
2014-05-18	7.1	9.6	10.67	9.09	8.17	2014-05-18						2014-05-18	4.6	4.02	5.04	5.59	5.26	2014-05-18	3.34	2	2.42	3.43	3.98	2014-05-18	1.8	3.28	3.65	1.92
2014-05-19	7.95	10.56	11.69	10.09	8.62	2014-05-19						2014-05-19	6.5	4.35	5.19	5.85	5.39	2014-05-19	3.51	2.12	2.58	3.53	2.87	2014-05-19	2.8	4.55	4.3	2.13
2014-05-20	7.7	10.49	11.54	9.95	8.56	2014-05-20	6.93	3.15	3.47	4.28	4.37	2014-05-20	5.75	4.39	5.16	5.67	5.31	2014-05-20	3.59	2.16	2.6	3.59	2.92	2014-05-20	2.37	3.88	3.96	2.02
2014-05-21	7.83	10.56	11.61	9.26	7.98	2014-05-21	6.81	3.32	3.65	4.39	4.6	2014-05-21	5.44	4.57	5.24	5.75	5.46	2014-05-21	3.59	2.12	2.53	3.53	2.85	2014-05-21	2.33	3.79	3.79	1.96
2014-05-22	7.49	10.6	11.61	9.92	8.53	2014-05-22	6.5	3.23	3.49	4.46	4.62	2014-05-22	4.85	4.62	5.29	5.9	5.49	2014-05-22	3.53	2.12	2.64	3.63	2.97	2014-05-22	2.15	3.59	3.59	1.93
2014-05-23	7.34	10.6	11.73	9.57	7.98	2014-05-23						2014-05-23	4.62	4.73	5.34	5.85	5.51	2014-05-23	3.55	2.15	2.56	3.49	2.87	2014-05-23	2.04	3.45	3.42	1.89
2014-05-24	9.26	10.64	11.5	9.71	8.56	2014-05-24						2014-05-24	8.46	4.66	5.31	5.8	5.49	2014-05-24	3.57	2.16	2.6	3.55	2.88	2014-05-24	3.3	5.12	5.24	2.18
2014-05-25	8.49	10.31	11.23	9.53	8.08	2014-05-25	7.64	3.28	3.53	4.33	4.53	2014-05-25	6.53	4.6	5.24	5.8	5.41	2014-05-25	3.61	2.09	2.53	3.47	2.87	2014-05-25	2.13	4.04	4.3	1.96
2014-05-26	8.4	10.64	10.56	8.82	8.01	2014-05-26						2014-05-26	5.77	4.76	5.29	5.75	5.39	2014-05-26	3.61	2.07	2.48	3.38	2.85	2014-05-26	1.85	3.59	3.88	2.02
2014-05-28	7.37	10.49	11.31	9.46	8.24	2014-05-28						2014-05-28	4.24	4.76	5.34	5.72	5.44	2014-05-28	3.53	2.1	2.45	3.42	2.83	2014-05-28	1.61	2.94	3.3	1.77
2014-05-29	7.22	10.71	11.31	9.39	8.24	2014-05-29	5.72	3.75	3.79	4.5	4.57	2014-05-29	3.59	4.88	5.41	5.75	5.39	2014-05-29	3.51	2.12	2.55	3.53	2.88	2014-05-29	1.65	2.87	3.24	1.65
2014-05-30	6.78	10.75	11.54	9.64	8.82	2014-05-30						2014-05-30	3.11	4.83	5.54	5.98	5.51	2014-05-30	3.42	2.13	2.61	3.61	2.95	2014-05-30	1.55	2.61	3.02	1.56
2014-05-31	6.73	10.86	11.5	9.6	8.33	2014-05-31						2014-05-31	2.85	4.57	5.44	5.88	5.57	2014-05-31	3.38	2.12	2.53	3.55	2.97	2014-05-31	1.65	2.6	3.02	1.51
2014-06-01	7.49	10.71	11.16	9.36	8.49	2014-06-01						2014-06-01	4.09	4.44	5.39	5.82	5.46	2014-06-01	3.23	2.13	2.56	3.49	2.92	2014-06-01	2.25	3.19	2.87	1.46
2014-06-02	9.06	10.53	11.65	9.64	8.2	2014-06-02						2014-06-02	6.53	4.57	5.51	5.93	5.34	2014-06-02	3.45	2.16	2.63	3.61	2.97	2014-06-02	2.64	4.39	4.09	1.56
2014-06-03	8.59	10.64	11.5	9.88	8.59	2014-06-03						2014-06-03	5.46	4.48	5.44	6.04	5.57	2014-06-03	3.43	2.12	2.75	3.59	2.92	2014-06-03	2.19	3.73	3.61	1.49
2014-06-04	7.89	10.42	11.42	9.53	8.11	2014-06-04	7.7	3.88	3.67	4.46	4.53	2014-06-04	4.88	4.46	5.34	5.67	5.31	2014-06-04	3.55	2.13	2.55	3.57	2.94	2014-06-04	2.13	3.55	3.4	1.45
2014-06-05	7.92	11.08	11.92	9.78	8.36	2014-06-05						2014-06-05	4.19	4.62	5.49	5.77	5.41	2014-06-05	3.63	2.13	2.58	3.57	2.94	2014-06-05	1.99	3.4	3.26	1.44
2014-06-07	12.92	18.11	16.4	10.53	8.3	2014-06-07						2014-06-07	8.92	7.95	8.36	6.93	5.82	2014-06-07	5.9	2.8	3.1	3.67	2.95	2014-06-07	2.55	5.04	5.88	3.02
2014-06-08	10.67	16.86	16.54	10.86	8.43	2014-06-08						2014-06-08	7.02	7.43	8.14	6.81	5.72	2014-06-08	5.39	2.75	2.97	3.61	2.83	2014-06-08	2.45	4.57	5.31	2.68
2014-06-09	9.92	16.12	16.17	10.67	8.36	2014-06-09						2014-06-09	6.14	7.31	8.08	6.9	5.64	2014-06-09	4.95	2.73	2.94	3.55	4.13	2014-06-09	2.23	4.33	4.9	2.43
2014-06-11	9.46	15.94	16.68	11.46	8.92	2014-06-11	8.33	5.51	4.73	5.39	4.92	2014-06-11	5.31	6.93	8.05	7.02	5.8	2014-06-11	4.55	2.75	3.06	3.71	3.04	2014-06-11	2.3	4	4.46	2.25
2014-06-12	8.59	15.49	16.77	11.81	8.99	2014-06-12	7.52	5.57	4.83	5.34	5.02	2014-06-12	4.17	6.67	7.89	6.93	5.9	2014-06-12	4.26	2.81	3.13	3.81	3.04	2014-06-12	2.19	3.81	4.24	2.25
2014-06-14	13.42	19.59	20.36	13.25	9.67	2014-06-14	11.01	6.36	5.29	5.85	5.02	2014-06-14	9.12	8.24	8.92	8.08	6.53	2014-06-14	5.67	3.08	3.45	3.79	3.02	2014-06-14	2.76	4.97	6.2	3.19
2014-06-15	12.12	18.55	19.19	11.81	8.72	2014-06-15	9.67	6.67	5.57	5.82	5.24	2014-06-15	7.49	7.86	8.82	8.01	6.47	2014-06-15	5.26	3.11	3.49	3.83	3.01	2014-06-15	2.68	4.95	5.85	3.1
2014-06-16	10.27	17.43	19.34	13.62	9.88	2014-06-16	8.33	6.59	5.41	5.93	5.46	2014-06-16	6.04	7.28	8.66	8.01	6.5	2014-06-16	4.88	3.15	3.57	3.96	4.66	2014-06-16	2.51	4.57	5.24	2.8
2014-06-18	10.6	16.54	18.69	13.5	9.74	2014-06-18	9.53	6.5	5.41	5.64	5.34	2014-06-18	7.02	6.78	8.27	7.58	6.28	2014-06-18	4.46	2.88	3.3	3.85	3.06	2014-06-18	2.76	4.99	5.8	2.99
2014-06-19	9.36	16.22	18.3	13.17	9.64	2014-06-19	8.27	6.45	5.36	5.57	5.19	2014-06-19	5.75	6.42	8.01	7.73	5.88	2014-06-19	4.33	2.97	3.53	3.98	3.1	2014-06-19	2.53	4.6	5.26	2.76
2014-06-20	12.76	16.45	18.79	13.71	9.92	2014-06-20	11.31	6.56	5.39	5.72	5.31	2014-06-20	10.06	5.78	7.98	7.43	6.25	2014-06-20	4.62	2.94	3.42	3.9	3.04	2014-06-20	3.1	5.51	6.59	3.3
2014-06-21	11.35	16.65	18.5	13.58	9.74	2014-06-21	9.64	6.7	5.44	5.64	5.39	2014-06-21	7.86	6.73	7.92	7.49	5.9	2014-06-21	4.53	2.95	3.36	3.9	3.06	2014-06-21	2.81	4.88	5.85	3.36
2014-06-23	9.26	16.49	18.74	13.71	10.02	2014-06-23	7.95	6.31	5.26	5.72	5.34	2014-06-23	6.12	6.39	7.8	7.67	6.34	2014-06-23	4.3	2.9	3.32	3.92	3.06	2014-06-23	2.48	4.6	5.51	3.21
2014-06-24	7.95	15.76	18.4	13.67	10.06	2014-06-24	6.56	6.12	5.36	5.62	5.39	2014-06-24	4.55	5.77	7.49	7.34	6.23	2014-06-24	3.94	2.99	3.55	4.06	3.21	2014-06-24	2.47	4.39	5.02	2.8
2014-06-26	6.25	14.26	17.82	13.62	10.17	2014-06-26	4.9	5.44	5.34	5.57	5.44	2014-06-26	3.38	5.07	6.87	7.07	6.14	2014-06-26	3.23	2.71	3.32	4	3.19	2014-06-26	2.34	4.02	4.35	2.33
2014-06-27	5.04	12.36	16.77	13.46	10.24	2014-06-27	3.69	4.92	5.09	5.49	5.46	2014-06-27	2.58	4.48	6.36	6.87	6.06	2014-06-27	2.97	2.63	3.36	4.04	3.24	2014-06-27	1.95	3.61	3.94	2.19
2014-06-28	4.55	10.93	15.62	13.33	10.35	2014-06-28	3.34	4.57	4.92	5.39	5.41	2014-06-28	2.25	3.98	5.9	6.5	5.93	2014-06-28	2.95	2.4	2.81	3.4	3.38	2014-06-28	1.79	3.24	3.49	1.88
2014-06-30	4.26	10.13	14.39	12.96	10.24	2014-06-30	2.85	4	4.48	5.31	5.51	2014-06-30	1.89	3.65	5.57	6.36	6.09	2014-06-30	2.81	2.28	2.66	3.65	3.47	2014-06-30	1.62	2.9	3.23	1.68
2014-07-01	3.92	9.33	13.37	12.32	9.29	2014-07-01	2.83	3.92	4.48	5.04	5.34	2014-07-01	2.03	3.75	5.44	6.12	5.69	2014-07-01	2.58	2.25	3.34	4.02	3.19	2014-07-01	1.72	2.76	3.01	1.71
2014-07-04	4.19	9.12	12.48	11.54	9.12	2014-07-04	3.17	3.73	4.22	4.88	5.24	2014-07-04	2.43	3.75	5.29	5.88	5.64	2014-07-04	2.76	2.43	2.75	3.02	3.47	2014-07-04	2.03	2.97	2.87	1.52
2014-07-05	4.09	8.89	12.28	11.89	9.43	2014-07-05	3.11	3.67	4.11	5.02	5.21	2014-07-05	2.31	3.75	5.24	5.85	5.59	2014-07-05	2.63	2.15	2.92	3.96	3.21	2014-07-05	2.07	3.04	3.06	1.57
2014-07-07	3.85	8.66	11.54	11.46	9.53	2014-07-07	2.94	3.71	4.17	4.88	5.24	2014-07-07	2.19	3.69	5.16	5.72	5.57	2014-07-07	2.64	2.12	2.83	3.94	3.17	2014-07-07	1.71	2.68	2.75	1.44
2014-07-08	3.71	8.17	11.16	10.31	8.85	2014-07-08	2.45	3.38	3.94	4.85	5.21	2014-07-08	1.88	3.55	5.09	5.82	5.64	2014-07-08	2.48	2.07	2.87	3.96	3.24	2014-07-08	1.68	2.68	2.85	1.43
2014-07-09	3.51	7.92	10.93	10.82	9.29	2014-07-09	2.48	3.42	3.92	4.71	5.09	2014-07-09	1.84	3.51	5.02	5.62	5.41	2014-07-09	2.5	2.06	2.69	3.79	3.15	2014-07-09	1.71	2.63	2.87	1.45
2014-07-10	3.61	7.95	10.64	10.6	8.92	2014-07-10	2.36	3.3	3.85	4.55	5.02	2014-07-10	1.84	3.49	4.92	5.59	5.49	2014-07-10	2.43	2.03	2.63	3.77	3.11	2014-07-10	1.71	2.55	2.85	1.38
2014-07-11	3.45	7.72	10.24	10.56	9.29	2014-07-11	2.23	3.28	3.77	4.41	4.92	2014-07-11	1.66	3.42	4.78	5.26	5.19	2014-07-11	2.36	1.97	2.63	3.69	3.1	2014-07-11	1.65	2.42	2.83	1.43
2014-07-12	3.28	7.67	10.13	10.09	9.06	2014-07-12	2.22	3.15	3.69	4.62	5.09	2014-07-12	1.7	3.32	4.73	5.24	5.19	2014-07-12	2.34	2	2.64	3.79	3.17	2014-07-12	1.63	2.43	2.81	1.42
2014-07-13	3.23	7.49	9.74	9.09	7.89	2014-07-13	2.09	3.06	3.61	4.39	4.85	2014-07-13	1.6	3.28	4.73	5.31	5.29	2014-07-13	2.19	1.93	2.48	3.67	3.1	2014-07-13	1.44	2.2	2.6	1.37
2014-07-14	3.34	7.58	9.39	9.46	8.33	2014-07-14	2.16	3.08	3.65	4.35	4.85	2014-07-14	1.66	3.26	4.64	5.24	5.12	2014-07-14	2.25	1.92	2.55	3.77	3.08	2014-07-14	1.6	2.26	2.63	1.37
2014-07-15	3.08	7.25	9.43	9.22	8.01	2014-07-15	2.2	3.11	3.55	4.37	4.69	2014-07-15	1.66	3.17	4.6	5.14	5.12	2014-07-15	2.2	1.89	2.45	3.65	3.08	2014-07-15	1.58	2.16	2.53	1.33
2014-07-18	12.16	19.04	20.83	14.26	9.88	2014-07-18	9.64	6.93	5.9	6.31	6.31	2014-07-18	9.53	9.33	10.64	10.17	8.14	2014-07-18	6.36	3.75	4.71	5.75	3.85	2014-07-18	2.88	4.95	5.88	2.92
2014-07-19	9.06	17.1	19.85	14.35	10.17	2014-07-19	8.17	6.81	5.8	6.23	6.23	2014-07-19	7.16	8.4	10.24	10.02	8.14	2014-07-19	5.59	3.71	4.78	5.93	4.04	2014-07-19	2.68	4.48	5.39	2.75
2014-07-22	6.9	13.37	17.19	14.22	10.82	2014-07-22	5.69	5.98	5.69	6.28	6.9	2014-07-22	4.88	6.64	9.02	9.57	8.05	2014-07-22	4.41	3.3	4.33	5.67	4.06	2014-07-22	2.36	3.77	4.39	2.25
2014-07-23	6.14	12.4	15.99	13.58	10.71	2014-07-23	5.19	5.75	5.57	6.14	6.67	2014-07-23	4.35	6.12	8.3	8.95	7.89	2014-07-23	4.02	3.08	4.04	5.54	4.02	2014-07-23	2.26	3.73	4.22	2.13
2014-07-24	5.96	11.58	15	12.56	10.17	2014-07-24	5.16	5.8	5.59	5.96	6.5	2014-07-24	4.15	5.82	7.7	8.33	7.46	2014-07-24	3.9	3.01	3.79	5.29	4.04	2014-07-24	2.43	3.73	4.24	2.15
2014-07-25	5.29	10.13	13.58	12.76	11.27	2014-07-25	4.39	5.24	5.19	5.9	6.56	2014-07-25	3.57	5.24	6.9	7.64	7.25	2014-07-25	3.49	2.78	3.43	5.02	3.88	2014-07-25	2.31	3.65	4	2.02
2014-07-26	4.83	9.22	12.24	13	11.61	2014-07-26	4.02	4.88	5.04	5.69	6.45	2014-07-26	3.13	4.73	6.28	7.19	7.13	2014-07-26	3.21	2.61	3.3	4.88	3.98	2014-07-26	2.16	3.49	3.73	1.96
2014-07-27	4.69	8.79	11.23	11.65	10.24	2014-07-27	3.75	4.53	4.78	5.44	6.23	2014-07-27	2.87	4.5	5.88	6.59	6.67	2014-07-27	3.1	2.43	2.99	4.5	3.83	2014-07-27	1.97	3.26	3.43	1.77
2014-07-28	4.41	8.49	10.75	10.64	10.06	2014-07-28	3.32	4.22	4.53	5.16	6.17	2014-07-28	2.64	4.22	5.54	6.12	6.45	2014-07-28	2.85	2.26	2.92	4.35	3.88	2014-07-28	1.88	3.11	3.24	1.72
2014-07-29	4.24	8.14	10.24	11.23	10.31	2014-07-29	3.28	4.22	4.44	5.16	6.31	2014-07-29	2.61	4.19	5.44	5.9	6.12	2014-07-29	2.81	2.09	2.75	4.13	3.73	2014-07-29	1.91	3.06	3.13	1.67
2014-07-30	13.58	13.29	10.75	10.49	9.6	2014-07-30	10.71	4.92	5.02	5.62	5.96	2014-07-30	12.16	8.11	8.36	8.4	7.25	2014-07-30	5.07	2.31	2.71	4.06	3.65	2014-07-30	3.17	5.26	6.59	3.36
2014-08-01	7.95	11.85	12.04	11.31	10.86	2014-08-01	7.16	4.9	4.99	5.54	6.09	2014-08-01	6.45	6.47	7.4	7.49	6.93	2014-08-01	4.46	2.43	2.88	4.17	3.63	2014-08-01	2.68	4.39	5.04	2.63
2014-08-02	6.45	10.71	12	10.56	9.78	2014-08-02	6.04	4.78	4.95	5.49	6.09	2014-08-02	5.07	5.72	6.84	7.13	6.7	2014-08-02	3.96	2.37	2.8	4.06	3.57	2014-08-02	2.61	4.13	4.64	2.42
2014-08-05	5.21	8.82	11.58	11.23	10.75	2014-08-05	4.69	4.35	4.5	5.24	5.88	2014-08-05	3.63	4.69	5.93	6.23	6.06	2014-08-05	3.11	2.22	2.76	4.02	3.47	2014-08-05	2.36	3.47	3.67	1.89
2014-08-06	4.71	8.05	10.64	10.31	9.85	2014-08-06	3.9	4.11	4.22	5.07	5.72	2014-08-06	3.04	4.33	5.44	5.85	5.75	2014-08-06	2.9	2.18	2.75	3.92	3.45	2014-08-06	2.2	3.32	3.45	1.85
2014-08-07	4.53	7.8	9.99	9.71	9.29	2014-08-07	3.63	4.02	4.24	4.9	5.59	2014-08-07	2.73	4.02	5.14	5.51	5.57	2014-08-07	2.78	2.2	2.76	3.88	3.45	2014-08-07	2.04	3.06	3.11	1.67
2014-08-08	4.46	7.64	9.95	10.53	9.95	2014-08-08	3.26	3.81	4.09	4.66	5.24	2014-08-08	2.56	3.94	5.12	5.34	5.29	2014-08-08	2.68	2.04	2.81	3.79	3.38	2014-08-08	1.99	3.02	3.06	1.58
2014-08-09	4.15	7.31	9.43	8.92	8.82	2014-08-09	3.19	3.81	4.09	4.64	5.19	2014-08-09	2.43	3.79	4.95	5.36	5.19	2014-08-09	2.56	1.99	2.75	3.71	3.3	2014-08-09	1.91	2.88	2.99	1.56
2014-08-10	4.9	7.46	9.39	9.22	9.16	2014-08-10	4.8	3.77	3.98	4.62	5.24	2014-08-10	4.04	3.92	4.99	5.34	5.16	2014-08-10	2.71	2.06	2.6	3.73	3.24	2014-08-10	2.69	3.83	3.43	1.49
2014-08-11	4.55	7.46	9.22	8.76	8.76	2014-08-11	3.94	3.61	3.85	4.55	5.19	2014-08-11	3.1	3.9	4.97	5.36	5.16	2014-08-11	2.78	2.09	2.6	3.69	3.21	2014-08-11	2.28	3.24	3.01	1.49
2014-08-12	4.3	7.22	9.12	9.43	9.6	2014-08-12	3.42	3.51	3.75	4.57	5.12	2014-08-12	2.76	3.81	4.88	5.26	5.16	2014-08-12	2.68	2.04	2.51	3.63	3.13	2014-08-12	2.26	3.17	3.01	1.48
2014-08-14	4.53	7.22	9.06	8.62	8.36	2014-08-14	3.67	3.71	3.92	4.41	4.97	2014-08-14	3.08	3.83	4.88	5.07	4.88	2014-08-14	2.63	2.06	2.6	3.65	3.17	2014-08-14	2.53	3.1	2.92	1.5
2014-08-15	4.19	7.13	9.06	9.02	9.19	2014-08-15	3.47	3.55	3.83	4.46	4.92	2014-08-15	2.71	3.71	4.8	5.09	4.85	2014-08-15	2.6	1.93	2.43	3.57	3.06	2014-08-15	2.26	2.95	2.88	1.43
2014-08-16	4.24	7.1	8.76	8.17	8.05	2014-08-16	3.3	3.69	3.85	4.28	4.83	2014-08-16	2.51	3.75	4.76	4.99	4.71	2014-08-16	2.6	2.04	2.56	3.59	3.1	2014-08-16	2.07	2.88	2.9	1.5
2014-08-17	3.9	6.84	8.56	8.2	8.46	2014-08-17	3.04	3.38	3.65	4.44	4.9	2014-08-17	2.31	3.59	4.64	4.92	4.73	2014-08-17	2.51	1.92	2.51	3.51	3.11	2014-08-17	1.95	2.85	2.83	1.49
2014-08-18	3.71	6.84	8.56	8.33	8.79	2014-08-18	2.9	3.42	3.61	4.33	4.9	2014-08-18	2.31	3.59	4.64	5.02	4.76	2014-08-18	2.53	1.97	2.5	3.55	3.11	2014-08-18	1.85	2.73	2.76	1.38
2014-08-19	3.88	6.81	8.4	8.46	8.33	2014-08-19	2.99	3.57	3.75	4.33	4.83	2014-08-19	2.2	3.57	4.62	4.83	4.62	2014-08-19	2.61	1.95	2.42	3.47	3.04	2014-08-19	1.91	2.75	2.85	1.41
2014-08-20	3.71	6.73	8.14	7.67	7.67	2014-08-20	2.85	3.43	3.61	4.24	4.62	2014-08-20	2.31	3.65	4.66	4.85	4.64	2014-08-20	2.58	1.91	2.61	3.51	3.06	2014-08-20	1.79	2.64	2.78	1.42
2014-08-25	4.13	6.9	7.89	7.43	7.52	2014-08-25	3.26	3.49	3.59	4.22	4.69	2014-08-25	2.51	3.61	4.57	4.69	4.48	2014-08-25	2.45	1.85	2.34	3.43	2.97	2014-08-25	2.03	2.9	2.87	1.42
2014-09-20	7.02	8.08	8.89	7.89	6.9	2014-09-20	5.69	4.33	4.22	4.53	4.95	2014-09-20	6.17	4.13	5.14	5.34	4.92	2014-09-20	3.36	2.4	3.08	4.3	3.28	2014-09-20	3.21	4.28	3.32	1.55
2014-10-06	14.78	18.06	14.61	8.92	7.13	2014-10-06	12.12	8.05	5.29	5.04	4.9	2014-10-06	12.2	10.71	10.78	8.89	6.7	2014-10-06	7.22	4.17	4.97	5.88	3.65	2014-10-06	3.01	4.85	6.09	3.11
2014-10-15	10.38	15.85	14.91	9.6	6.64	2014-10-15	8.17	7.25	5.51	5.02	4.88	2014-10-15	6.01	7.61	9.33	8.49	6.78	2014-10-15	5.54	3.63	4.9	6.14	3.88	2014-10-15	2.34	3.69	4.24	2.13
2014-10-25	9.26	14.52	13.54	9.02	6.7	2014-10-25	6.36	6.53	5.09	4.92	4.95	2014-10-25	4.06	6.04	7.73	7.07	5.9	2014-10-25	4.73	3.32	4.41	5.77	4.83	2014-10-25	2.18	3.06	3.24	1.65
2014-11-08	7.73	12.4	11.89	8.95	6.78	2014-11-08	4.71	5.31	4.66	4.62	4.69	2014-11-08	2.69	4.46	5.9	5.82	5.31	2014-11-08	4.06	2.94	4.04	5.36	3.71	2014-11-08	1.92	2.68	2.76	1.41
2014-11-17	7.31	11.81	11.46	8.08	6.23	2014-11-17	4.5	5.44	4.57	4.55	4.8	2014-11-17	2.45	4.46	5.77	5.82	5.26	2014-11-17	3.83	2.71	3.73	5.04	3.57	2014-11-17	1.76	2.68	2.81	1.43
2014-11-28	6.9	11.23	11.08	7.89	6.06	2014-11-28	4.19	5.12	4.5	4.44	4.5	2014-11-28	2.36	4.26	5.59	5.59	4.97	2014-11-28	3.63	2.61	3.51	4.8	3.49	2014-11-28	1.84	2.64	2.78	1.37
2014-12-10	4.28	8.49	9.85	7.07	5.59	2014-12-10	2.64	3.85	3.94	4.09	4.24	2014-12-10	1.95	3.75	5.19	5.24	4.66	2014-12-10	2.53	2.13	3.19	4.62	3.4	2014-12-10	1.35	2.12	2.58	1.35
2015-02-13	3.73	8.92	9.12	6.56	5.31	2015-02-13	2.13	4	3.73	4.11	4.19	2015-02-13	1.52	3.42	5.04	5.12	4.6	2015-02-13	2.42	2.34	3.21	4.28	3.28	2015-02-13	1.31	2	2.73	1.42
2015-03-20	4.71	10.09	10.38	7.7	6.25	2015-03-20	2.51	4.3	4.09	4.26	4.39	2015-03-20	1.56	3.43	5.12	5.24	4.73	2015-03-20	3.19	2.4	3.19	4.35	3.36	2015-03-20	1.41	2.12	2.76	1.37
2015-04-10	6.73	9.88	10.24	7.67	6.28	2015-04-10	4.83	4.24	4.13	4.44	4.57	2015-04-10	4.15	3.57	5.14	5.41	4.9	2015-04-10	3.19	2.3	3.06	4.24	3.24	2015-04-10	1.84	3.08	3.11	1.48
2015-04-20	5.39	9.78	10.75	8.27	6.7	2015-04-20	4	4.24	4.26	4.53	4.73	2015-04-20	3.01	3.88	5.24	5.57	5.09	2015-04-20	2.88	2.13	3.04	4.04	4.06	2015-04-20	1.46	2.45	2.64	1.31
2015-05-15	10.2	14.43	13.96	8.89	7.04	2015-05-15	7.4	6.06	5.29	5.44	4.95	2015-05-15	5.93	6.59	6.17	5.36	4.85	2015-05-15	5.07	2.9	3.15	3.73	2.92	2015-05-15	2.03	3.63	4.13	2.2
2015-05-25	5.8	12.2	12.72	9.5	7.64	2015-05-25	3.55	4.76	4.75	4.92	5.02	2015-05-25	2.18	4.41	5.69	5.57	5.09	2015-05-25	3.71	2.43	2.9	3.98	3.08	2015-05-25	1.58	2.43	2.85	1.48
2015-06-06	5.19	8.95	10.06	8.49	7.1	2015-06-06	3.43	3.75	4.11	4.35	4.66	2015-06-06	2.87	3.63	4.83	4.97	4.69	2015-06-06	2.61	1.97	2.55	3.63	2.97	2015-06-06	2.48	2.94	2.58	1.35
2015-06-17	6.14	8.66	9.74	8.17	6.87	2015-06-17	4.55	3.77	4.06	4.41	4.66	2015-06-17	3.21	3.9	4.99	5.12	4.78	2015-06-17	3.08	2.07	2.69	3.71	3.08	2015-06-17	2.09	3.15	2.95	1.48

## Sheet: SWC(compacted LGM)
	CL1											CL2											CL3											CL4											CL5
Month	10cm	20cm	30cm	40cm	50cm	60cm	70cm	80cm	90cm	100cm	Month	10cm	20cm	30cm	40cm	50cm	60cm	70cm	80cm	90cm	100cm	Month	10cm	20cm	30cm	40cm	50cm	60cm	70cm	80cm	90cm	100cm	Month	10cm	20cm	30cm	40cm	50cm	60cm	70cm	80cm	90cm	100cm	Month	10cm	20cm	30cm	40cm	50cm
2013-08-01	6.81107	7.65786	5.7089	5.30909	4.72298	6.69265	7.94098	6.9304	7.71335	4.16174	2013-08-01	11.8083	12.0784	6.53196	8.0612	6.94196	9.17976	9.00459	5.6759	6.07512	5.89012	2013-08-01	11.6822	9.40636	6.91125	10.0653	11.1602	7.74752	6.85097	10.2378	11.746	7.1303	2013-08-01	14.1531	10.8542	11.5442	15.3545	11.8927	9.30392	6.82964	5.44127	7.34333	9.42554	2013-08-01	14.6271	21.1354	22.9077	26.2455	16.8634
2013-09-01	6.00989	6.5336	4.74235	4.4244	3.89091	6.37038	6.87486	6.93549	7.62851	4.21085	2013-09-01	10.3883	10.7123	5.76245	6.61485	6.2303	9.35643	9.13289	5.72803	6.0424	5.83802	2013-09-01	10.4837	8.24761	6.04188	8.09053	9.56624	7.85932	7.05102	10.2563	11.743	7.05766	2013-09-01	13.1924	10.038	10.5648	12.8523	11.1353	9.97578	7.35624	5.67731	7.39455	9.41294	2013-09-01	13.4195	19.0775	20.575	24.9783	17.2153
2013-10-01	3.63807	3.96561	3.21872	3.30707	3.24773	5.81862	6.12332	6.50753	7.32604	4.10837	2013-10-01	5.96351	6.42505	3.81081	4.53931	4.63905	7.97926	8.24372	5.41819	5.75542	5.66956	2013-10-01	5.92681	5.23055	4.19708	5.97429	7.67983	6.96583	6.63034	9.62986	11.0348	6.65672	2013-10-01	7.95619	6.30051	7.33712	9.32919	8.78202	8.64754	6.75839	5.3761	7.22928	9.02778	2013-10-01	8.0583	11.5704	13.3805	18.8367	14.0762
2013-11-01	3.37333	3.69	3.00667	3.09667	3.10333	5.45667	5.91333	6.36667	7.08	3.97333	2013-11-01	5.56	6.04	3.52667	4.24	4.33	7.53	7.87333	5.28333	5.63	5.49667	2013-11-01	5.59667	4.88667	3.97	5.68333	7.25333	6.58667	6.28667	9.37333	10.6933	6.54333	2013-11-01	7.15667	5.63333	6.71333	8.8	8.19667	8.28333	6.47667	5.16	7.07333	8.78333	2013-11-01	7.49333	10.64	12.1533	17.23	13.0133
2013-12-01	4.11333	5.39	4.17667	4.41333	4.04333	7.79	8.82667	8.96333	10.9567	5.81	2013-12-01	7.59333	8.69333	5.12667	6.53667	6.63	10.7867	11.1633	7.13	7.33667	7.16333	2013-12-01	7.65333	6.62667	5.25667	7.82667	9.5	8.19	7.95333	11.8133	13.4	7.70333	2013-12-01	9.43333	7.56667	9.01333	12.0567	10.78	10.6267	8.04	6.10667	8.58667	9.86333	2013-12-01	10.8967	16.8967	18.7067	23.42	15.8733
2014-01-01	3.27	3.57	2.90667	3.57333	3.76333	7.58667	8.64	9.03	10.7767	5.68667	2014-01-01	5.88667	5.67	3.68	5.42333	5.99	10.5033	10.7933	6.88333	7.22	6.94333	2014-01-01	5.8	4.76333	4.17333	7.42333	9.21333	8.04667	7.87	11.8033	13.2633	7.57333	2014-01-01	7.32667	5.28667	7.39	11.12	10.3033	10.2133	7.69	5.99667	8.21	9.53667	2014-01-01	8.09667	11.7367	14.99	21.4867	14.8933
2014-02-01	3.99333	4.76	3.91333	4.03667	3.79	7.44333	8.57667	8.84	10.7	5.54	2014-02-01	7.92	7.86333	4.92333	6.01667	6.01	10.1033	10.4933	6.84	7.02667	6.85667	2014-02-01	7.85667	6.77333	4.97	7.31333	9.05	7.92	7.91	11.7367	13.3033	7.52	2014-02-01	10.66	7.69333	8.53333	11.3	10.1033	9.9	7.58667	5.90333	7.95	9.29667	2014-02-01	11.7167	17.0067	17.65	21.4933	14.74
2014-03-01	4.01889	5.27556	4.06667	4.16111	3.97222	7.56667	8.88222	9.14889	10.9322	5.70667	2014-03-01	7.73444	8.57889	4.82778	6.08556	6.15333	10.4756	10.81	6.90889	7.16778	6.98556	2014-03-01	7.59111	6.43444	5.12	7.73778	9.38556	8.09333	8.08111	12.1611	13.5222	7.61333	2014-03-01	9.59556	7.37	8.51111	11.5033	10.4233	10.1611	7.71	5.86444	8.17889	9.50111	2014-03-01	10.6378	16.2933	17.6722	22.0633	15.1067
2014-04-01	3.81111	4.44778	3.58556	3.78111	3.75222	7.03444	8.33111	8.84667	10.56	5.57333	2014-04-01	6.98222	7.35778	4.26111	5.27889	5.34889	9.41333	9.74111	6.55667	6.73	6.75333	2014-04-01	6.89556	5.80889	4.63444	6.75444	8.39333	7.68444	7.47889	11.0967	12.6144	7.24889	2014-04-01	8.67667	6.20889	7.06222	9.54222	8.88	8.78889	6.89444	5.49889	7.40667	8.87	2014-04-01	8.64	11.3867	12.5189	17.5467	13.1422
2014-05-01	4.411	4.42317	3.31483	3.17533	3.19633	5.22083	6.205	6.69617	7.85567	4.348	2014-05-01	7.74248	7.55521	4.07697	4.50435	4.38851	7.66898	7.86604	5.42123	5.56717	5.3275	2014-05-01	7.55246	5.97895	4.43596	5.98754	7.50035	6.80947	6.59018	9.58702	10.7486	6.36035	2014-05-01	10.527	7.37404	7.55632	8.75474	7.84772	7.77947	6.11386	5.05018	6.55035	7.72	2014-05-01	10.9781	14.1947	13.5684	16.2093	12.0653
2014-06-01	5.12606	5.10864	3.67636	3.38773	3.21136	4.94333	5.895	6.31348	7.42576	4.21348	2014-06-01	8.68712	8.48652	4.60227	5.01515	4.49909	7.50273	7.64273	5.565	5.54515	5.26758	2014-06-01	8.74076	6.71535	4.85848	6.45955	8.08455	7.09924	6.64924	9.62318	10.6462	6.24242	2014-06-01	11.8318	8.55561	8.75061	10.1402	8.27106	7.90455	6.06864	5.09939	6.53409	7.64909	2014-06-01	12.1777	16.1021	16.4192	18.9353	12.7898
2014-07-01	4.22167	4.60227	3.66606	3.47439	3.38606	5.38848	6.33318	6.72227	7.73818	4.42106	2014-07-01	7.25	7.36485	4.44758	5.26106	4.88091	8.32682	8.34015	6.14955	6.24773	5.79192	2014-07-01	7.29106	6.12667	4.77606	6.74636	8.66348	7.6903	7.15242	10.4112	11.255	6.38303	2014-07-01	9.73773	7.17848	8.02818	10.0055	8.76015	8.52333	6.25712	5.25803	6.83591	8.01212	2014-07-01	10.3804	14.6941	15.7386	20.44	13.9818
2014-08-01	4.20833	4.35778	3.5163	3.25944	3.20037	4.93648	5.87889	6.49704	7.55704	4.46315	2014-08-01	7.30076	6.95759	4.23833	4.93852	4.50167	7.88222	8.07926	6.26019	6.39341	5.93476	2014-08-01	7.11843	5.83039	4.59098	6.39196	8.47529	7.64784	7.16196	10.2598	11.2875	6.34588	2014-08-01	9.61196	7.08431	7.4802	9.58353	8.43392	8.65784	6.29431	5.26137	6.86333	8.02922	2014-08-01	10.6192	14.1469	15.3959	20.8288	14.4857
2014-09-01	5.36667	4.28	3.41667	3.28667	3.15	4.99	5.71	6.29333	7.41333	4.54667	2014-09-01	8.95333	6.52	3.88667	4.63667	4.47	7.77333	8.13333	5.67667	6.10597	5.61358	2014-09-01	8.78667	5.72	4.40667	6.09333	8.42	7.65	7.15333	10.1567	10.9533	6.07667	2014-09-01	11.62	6.61	7.34333	9.47	8.56	8.76	6.15333	5.14333	6.62	7.77667	2014-09-01	12.6	13.8533	14.11	18.96	13.61
2014-10-01	4.41889	4.9	3.76889	3.55667	3.26444	5.01556	5.63444	6.13556	7.29333	4.51222	2014-10-01	7.58	7.48333	4.39333	5.28222	5.00889	8.23	8.30111	5.78556	6.27929	5.68209	2014-10-01	8.08295	6.69664	5.52376	7.54429	9.05595	8.77735	7.5899	9.92225	11.3693	6.09619	2014-10-01	10.9056	8.12111	9.32111	12.6244	10.79	10.2289	6.74444	5.40778	6.76667	7.76667	2014-10-01	12.1578	17.8811	19.3389	24.9156	17.1867
2014-11-01	3.41	3.86333	3.21667	3.08111	2.93444	4.61778	5.26111	5.83333	6.91667	4.01	2014-11-01	5.48889	5.88778	3.63667	4.35889	4.16222	7.11333	7.49444	5.46444	5.76925	5.30926	2014-11-01	5.98549	5.06144	4.50615	5.52783	7.54404	7.35581	6.81688	9.53128	10.3787	5.91645	2014-11-01	7.35111	5.53556	6.59833	8.90778	8.10333	8.465	6.12667	4.85556	6.56722	7.53	2014-11-01	8.32778	12.49	13.7267	18.7378	13.3289
2014-12-01	3.05	3.61667	2.98	2.86667	2.83667	4.48	5.13667	5.66667	6.76	4.17333	2014-12-01	5.12667	5.34667	3.36333	4.12333	3.98	6.88667	7.18333	5.06667	5.40185	4.91895	2014-12-01	5.53394	4.71939	3.93534	5.13355	7.25673	7.21969	6.67874	9.41231	10.0026	5.642	2014-12-01	6.90127	5.16313	6.31557	7.89956	7.94697	7.82606	5.82336	4.88479	6.35009	7.21786	2014-12-01	8.27333	11.33	13.08	17.1633	12.87
2015-01-01	2.93	3.68333	3.01833	2.86667	2.8	4.40667	5.07333	5.605	6.67333	4.12833	2015-01-01	4.89333	5.50667	3.39667	4.09	3.89333	6.75667	7.07833	5.01333	5.28059	4.85146	2015-01-01	5.36399	4.76551	3.95208	5.15094	7.2426	7.04388	6.58656	9.40717	9.94959	5.64944	2015-01-01	6.542	5.18456	6.33774	7.96898	7.82315	7.79453	5.79169	4.83261	6.30935	7.18349	2015-01-01	7.82667	11.735	13.1267	17.32	12.575
2015-02-01	2.81	3.75	3.05667	2.86667	2.76333	4.33333	5.01	5.54333	6.58667	4.08333	2015-02-01	4.66	5.66667	3.43	4.05667	3.80667	6.62667	6.97333	4.96	5.15934	4.78398	2015-02-01	5.19404	4.81164	3.96882	5.16833	7.22847	6.86808	6.49438	9.40202	9.89661	5.65687	2015-02-01	6.18272	5.20598	6.3599	8.0384	7.69932	7.76299	5.76002	4.78042	6.26861	7.14912	2015-02-01	7.38	12.14	13.1733	17.4767	12.28
2015-03-01	3.31	4.05	3.16333	2.98333	2.84333	4.51333	5.15333	5.65667	6.77	4.21667	2015-03-01	5.31667	6.21	3.79	4.34	3.99333	6.63333	7.07333	5.28667	5.36897	5.04636	2015-03-01	6.23404	5.38543	4.1925	5.69179	7.93497	6.82428	6.32538	10.7794	9.93974	5.8037	2015-03-01	7.00248	5.29148	6.46987	7.86752	7.6266	7.60178	5.71748	4.8694	6.34499	7.29986	2015-03-01	8.43667	12.46	13.5867	18.03	12.8267
2015-04-01	4.53667	4.745	3.46333	3.18833	3.00833	4.70333	5.41	5.90333	7.06833	3.91833	2015-04-01	7.95167	7.72333	3.99333	4.49167	4.10667	7.13833	7.37167	5.26667	5.50805	5.10266	2015-04-01	8.39025	6.10414	4.37215	5.81581	7.81487	7.30216	6.90679	10.0051	10.626	5.97018	2015-04-01	8.32263	5.79384	6.62232	7.65392	7.68938	7.61547	5.78532	4.89992	6.40761	7.43248	2015-04-01	9.70667	12.3617	13.0633	17.1367	12.4333
2015-05-01	4.05667	4.71	3.83833	3.57333	3.455	5.19167	6.49	6.34667	7.41833	4.41167	2015-05-01	5.93211	5.43573	4.57983	6.15033	4.46039	7.24003	7.6483	11.2024	10.4993	5.07452	2015-05-01	7.10394	5.99198	5.05683	7.45367	8.86049	8.50823	7.18253	9.45763	10.7809	5.95166	2015-05-01	8.83211	6.84298	7.83002	9.18116	8.22564	7.60668	5.77099	4.91334	6.34808	7.37129	2015-05-01	9.645	13.7333	14.5133	18.89	12.4333
2015-06-01	4.35833	4.04167	3.38333	3.16833	3.07167	4.925	5.95833	6.24833	7.52167	4.455	2015-06-01	6.098	4.47909	3.7012	4.61496	3.38912	6.1885	7.38906	11.5929	11.271	5.34472	2015-06-01	6.9771	5.21467	4.28265	6.08488	7.86432	7.86314	6.99354	9.95628	10.6295	5.9193	2015-06-01	8.70208	5.67281	6.64872	7.718	7.798	7.58669	5.73013	4.8933	6.31783	7.3324	2015-06-01	9.91667	11.145	11.4733	15.48	11.3083
2015-07-01	6.61	6.815	5.235	4.91333	4.53167	7.67167	9.32333	9.65167	11.3717	5.97833	2015-07-01	9.83931	7.53857	5.46633	7.2482	5.59887	8.8655	11.0659	17.6432	17.113	8.01177	2015-07-01	11.2416	8.13809	6.06534	10.2881	11.7289	12.2117	11.0658	15.6578	17.6833	8.78444	2015-07-01	13.0006	9.44982	10.4041	12.5133	11.2486	10.6944	7.98969	6.34246	8.74732	9.54243	2015-07-01	15.3717	20.255	19.465	23.5367	16.73
2015-08-01	4.37333	4.85833	4.04	3.81333	3.64167	6.655	8.46667	9.435	12.0967	6.50833	2015-08-01	6.38783	4.93138	4.36157	5.68979	4.29214	8.51603	10.407	15.9092	15.0999	6.37258	2015-08-01	7.08321	5.85405	5.04383	8.11835	9.3621	10.292	10.4202	15.8185	17.0558	8.81249	2015-08-01	8.31833	6.28318	7.86806	10.2812	9.73063	9.70864	7.41746	5.96387	8.50526	9.97509	2015-08-01	10.4867	15.9283	18.3283	24.1	17.655
	CL1											CL2											CL3											CL4											CL5
Date	10cm	20cm	30cm	40cm	50cm	60cm	70cm	80cm	90cm	100cm	Date	10cm	20cm	30cm	40cm	50cm	60cm	70cm	80cm	90cm	100cm	Date	10cm	20cm	30cm	40cm	50cm	60cm	70cm	80cm	90cm	100cm	Date	10cm	20cm	30cm	40cm	50cm	60cm	70cm	80cm	90cm	100cm	Date	10cm	20cm	30cm	40cm	50cm
2017-05-12	6.54	6.84	3.78	3.27	3.27	5.41	6.41	6.88	8.26	4.56	2017-05-12	11.16	10.63	5.04	4.71	4.51	7.7	8	5.58	5.61	5.47	2017-05-12	10.93	8.49	5.15	6.03	7.42	6.76	6.66	9.76	10.86	6.36	2017-05-12	14.38	9.91	8.47	8.74	7.82	7.74	6.02	5.04	6.46	7.72	2017-05-12	14.36	18.22	12.67	15.43	11.92
2017-05-13	5.79	6.09	3.79	3.28	3.25	5.25	6.39	6.91	8.22	4.55	2017-05-13	9.82	9.7	4.88	4.8	4.51	7.71	7.99	5.51	5.6	5.47	2017-05-13	10.16	7.81	5.12	6.22	7.54	6.89	6.63	9.61	10.86	6.42	2017-05-13	13.44	9.52	8.77	8.95	7.89	7.83	6.09	5.1	6.52	7.73	2017-05-13	13.85	18.07	14.04	15.79	12.03
2017-05-14	4.93	5.23	3.57	3.21	3.2	5.33	6.29	6.82	8.08	4.47	2017-05-14	8.48	8.52	4.55	4.63	4.37	7.66	7.91	5.36	5.52	5.35	2017-05-14	8.84	7.02	4.92	6.05	7.41	6.71	6.51	9.55	10.74	6.34	2017-05-14	12.5	8.72	8.43	8.78	7.64	7.65	5.98	5.13	6.53	7.72	2017-05-14	12.82	17.27	14.52	15.62	11.81
2017-05-15	4.6	4.92	3.54	3.19	3.19	5.28	6.31	6.84	8.06	4.45	2017-05-15	8.39	8.21	4.49	4.59	4.28	7.74	7.95	5.26	5.52	5.36	2017-05-15	8.34	6.52	4.7	5.95	7.38	6.68	6.58	9.5	10.78	6.42	2017-05-15	11.46	8.28	8.27	8.88	7.74	7.72	6.07	4.97	6.51	7.69	2017-05-15	12.38	16.81	14.85	15.67	11.82
2017-05-17	3.99	4.38	3.38	3.18	3.18	5.22	6.18	6.71	7.91	4.35	2017-05-17	7.97	7.8	4.13	4.44	5.06	8.6	8.44	5.58	6.23	6.34	2017-05-17	7.01	5.89	4.49	5.92	7.39	6.73	6.53	9.57	10.69	6.38	2017-05-17	10.17	7.36	7.75	8.85	7.79	7.67	6.03	5	6.5	7.69	2017-05-17	11.22	15.92	15.19	15.92	11.89
2017-05-18	3.7	4.18	3.27	3.16	3.15	5.29	6.2	6.7	7.95	4.37	2017-05-18	6.7	7.11	4.1	4.54	4.23	7.68	7.93	5.36	5.52	5.32	2017-05-18	6.65	5.77	4.43	6.03	7.5	6.83	6.61	9.56	10.76	6.41	2017-05-18	9.84	6.99	7.6	8.89	7.83	7.73	6.11	5.05	6.53	7.71	2017-05-18	10.92	15.65	15.13	16.27	12.05
2017-05-19	4.88	4.17	3.31	3.19	3.21	5.23	6.24	6.77	7.91	4.36
2017-05-20	4.5	4.17	3.29	3.2	3.22	5.23	6.26	6.74	7.89	4.34	2017-05-20	7.87	7.19	4.06	4.58	4.42	7.67	8.1	5.5	5.47	5.33	2017-05-20	7.48	5.75	4.41	6.06	7.54	6.87	6.7	9.65	10.83	6.44	2017-05-20	11.36	7.58	7.69	9.06	7.99	7.91	6.15	5.13	6.57	7.78	2017-05-20	12.34	15.53	15.12	16.76	12.33
2017-05-21	4.2	4.12	3.29	3.19	3.23	5.25	6.19	6.89	7.81	4.33	2017-05-21	7.52	7.1	4	4.58	4.37	7.71	7.87	5.46	5.48	5.3	2017-05-21	7.07	5.68	4.4	6.04	7.64	6.92	6.68	9.66	10.9	6.4	2017-05-21	10.78	7.38	7.84	8.91	8.15	7.83	6.3	4.94	6.63	7.79	2017-05-21	11.2	14.99	14.92	17.02	12.42
2017-05-22	3.89	4.02	3.25	3.18	3.21	5.24	6.17	6.63	7.8	4.32	2017-05-22	7.33	8.27	3.61	3.81	4.96	7.89	8.14	5.29	6.79	5.84	2017-05-22	6.96	5.69	4.43	6.07	7.57	6.79	6.55	9.66	10.88	6.42	2017-05-22	9.73	7.05	7.9	8.78	7.95	7.93	6.23	5.04	6.77	7.86	2017-05-22	10.63	14.1	14.43	17.08	12.39
2017-05-23	3.75	4.02	3.26	3.19	3.21	5.17	6.21	6.57	7.71	4.27	2017-05-23	6.7	6.87	3.95	4.54	4.37	7.65	7.92	5.42	5.44	5.22	2017-05-23	6.59	5.55	4.3	6.05	7.57	6.88	6.64	9.64	10.72	6.39	2017-05-23	9.29	6.7	7.39	8.88	7.99	7.89	6.2	5.11	6.55	7.75	2017-05-23	9.75	13.34	13.84	16.84	12.38
2017-05-24	6.44	4.26	3.26	3.21	3.21	5.17	6.07	6.51	7.7	4.25	2017-05-24	11.25	7.74	4	4.56	4.26	7.75	7.91	5.3	5.46	5.22	2017-05-24	10.69	5.93	4.37	6.06	7.66	6.88	6.6	9.65	10.85	6.29	2017-05-24	14.4	8.46	7.6	8.95	7.96	7.93	6.18	4.98	6.54	7.75	2017-05-24	14.57	14.32	13.92	17.01	12.41
2017-05-25	5.01	4.29	3.18	3.09	3.15	5.1	6.13	6.53	7.67	4.25	2017-05-25	8.88	7.95	3.97	4.5	4.33	7.58	7.81	5.4	5.47	5.25	2017-05-25	8.53	5.87	4.28	6.03	7.55	6.9	6.65	9.59	10.74	6.39	2017-05-25	12.3	8.11	7.53	8.81	7.98	7.86	6.13	5.1	6.56	7.8	2017-05-25	12.58	14.64	13.93	16.98	12.34
2017-05-26	4.52	4.21	3.21	3.15	3.22	5.14	6.13	6.57	7.68	4.26	2017-05-26	7.96	7.53	3.94	4.52	4.37	7.67	7.84	5.45	5.5	5.25	2017-05-26	7.54	5.77	4.33	6.11	7.67	6.91	6.67	9.68	10.77	6.39	2017-05-26	10.65	7.65	7.62	8.9	7.96	7.98	6.18	5.14	6.66	7.83	2017-05-26	11.16	13.62	13.6	16.75	12.24
2017-05-28	3.8	4.01	3.16	3.16	3.18	5.1	6.04	6.46	7.54	4.23	2017-05-28	6.91	6.79	3.89	4.54	4.3	7.56	7.56	5.42	5.43	5.14	2017-05-28	6.33	5.42	4.17	5.87	7.46	6.83	6.58	9.54	10.61	6.37	2017-05-28	9.09	6.59	6.99	8.61	7.74	7.69	6.08	5.07	6.55	7.69	2017-05-28	9.37	12.14	12.71	16.35	12.02
2017-05-29	3.71	3.98	3.17	3.1	3.16	5.04	6.06	6.51	7.5	4.21	2017-05-29	6.4	6.85	3.89	4.46	4.31	7.55	7.73	5.42	5.37	5.15	2017-05-29	6.18	5.35	4.14	5.93	7.54	6.8	6.61	9.44	10.48	6.24	2017-05-29	8.46	6.41	7.11	8.65	7.84	7.76	6.14	5.11	6.54	7.66	2017-05-29	8.97	11.73	12.45	16.19	11.99
2017-05-30	3.47	3.86	3.16	3.04	3.1	4.98	5.94	6.44	7.28	4.13	2017-05-30	5.98	6.61	3.82	4.43	4.25	7.49	7.66	5.33	5.3	5.1	2017-05-30	5.91	5.25	4.13	5.79	7.42	6.77	6.53	9.5	10.62	6.25	2017-05-30	8.6	6.11	6.88	8.45	7.67	7.71	6.1	5.01	6.6	7.62	2017-05-30	8.83	11.48	12.24	16.03	11.76
2017-05-31	3.31	3.83	3.08	3.06	3.11	5.03	5.92	6.36	7.37	4.12	2017-05-31	5.79	6.49	3.73	4.31	4.27	7.44	7.63	5.38	5.32	5.03	2017-05-31	5.79	5.24	4.11	5.76	7.44	6.72	6.41	9.45	10.53	6.14	2017-05-31	8.16	5.97	6.72	8.45	7.7	7.67	6.04	5.05	6.5	7.61	2017-05-31	8.15	11.28	12.11	15.93	11.99
2017-06-02	5.75	4.14	3.11	3.02	3.06	4.91	5.85	6.35	7.38	4.12	2017-06-02	10.1	7.78	3.75	4.34	4.21	7.44	7.58	5.33	5.35	5.07	2017-06-02	10.07	5.99	4.14	5.79	7.46	6.84	6.56	9.47	10.53	6.15	2017-06-02	13.93	8.33	7.02	8.47	7.66	7.79	5.93	5.02	6.46	7.62	2017-06-02	14.25	14.56	12.28	16.23	11.95
2017-06-03	4.95	4.14	3.11	3.03	3.09	4.95	5.93	6.28	7.36	4.12	2017-06-03	8.54	7.58	3.79	4.4	4.24	7.46	7.69	5.39	5.37	5.1	2017-06-03	8.32	5.76	4.14	5.83	7.46	6.9	6.65	9.49	10.56	6.19	2017-06-03	11.44	7.89	7.22	8.51	7.73	7.8	6.14	5.01	6.54	7.57	2017-06-03	12.26	14.17	12.6	16.25	12.01
2017-06-04	4.63	4.1	3.12	3.06	3.1	4.93	5.92	6.31	7.34	4.18	2017-06-04	7.94	7.54	3.88	4.42	4.26	7.42	7.67	5.37	5.34	5.11	2017-06-04	7.43	5.76	4.2	5.78	7.53	6.92	6.6	9.46	10.48	6.18	2017-06-04	10.58	7.56	7.28	8.63	7.91	7.82	6.06	5.05	6.47	7.61	2017-06-04	11.04	13.8	12.78	16.46	12.1
2017-06-05	4.34	4.05	3.15	3.12	3.13	4.98	5.9	6.33	7.35	4.17	2017-06-05	7.42	7.23	3.9	4.49	4.26	7.43	7.51	5.37	5.38	5.15	2017-06-05	6.88	5.53	4.26	5.98	7.68	6.95	6.66	9.57	10.53	6.18	2017-06-05	10.01	7.09	7.25	8.51	7.93	7.61	6.15	5.08	6.63	7.68	2017-06-05	10.33	13.15	12.93	16.47	12.08
2017-06-07	6.46	7.04	4.47	3.8	3.23	5.1	5.88	6.29	7.3	4.15	2017-06-07	10.86	10.8	5.55	5.54	4.66	7.56	7.62	5.46	5.43	5.17	2017-06-07	10.65	8.49	6.07	7.46	8.54	7.07	6.66	9.59	10.61	6.15	2017-06-07	13.5	9.92	10.61	11.29	7.93	7.76	6.05	5.03	6.65	7.63	2017-06-07	14.2	20.18	20.38	19.12	12.63
2017-06-08	5.58	6.08	4.24	3.66	3.16	4.95	5.9	6.24	7.35	4.12	2017-06-08	9.52	9.94	5.36	5.66	4.54	7.41	7.54	5.47	5.51	5.17	2017-06-08	9.51	7.71	5.61	7.2	8.34	6.92	6.5	9.45	10.51	6.2	2017-06-08	12.58	9.28	9.85	11.63	8.04	7.66	5.98	4.98	6.5	7.59	2017-06-08	13.67	19.16	19.54	19.64	12.59
2017-06-09	5.06	5.46	3.99	3.52	3.17	4.81	5.81	6.24	7.33	4.15	2017-06-09	8.64	8.93	5.16	5.62	4.54	7.4	7.47	5.44	5.45	5.19	2017-06-09	8.65	6.99	5.27	7.04	8.34	7.01	6.54	9.44	10.47	6.17	2017-06-09	11.56	8.52	9.14	10.96	8.18	7.74	6	5.08	6.5	7.61	2017-06-09	12.66	17.83	18.67	19.69	12.74
2017-06-11	4.96	4.92	3.71	3.42	3.16	4.94	5.81	6.27	7.39	4.16	2017-06-11	8.1	7.9	4.57	5.21	4.48	7.47	7.61	5.46	5.47	5.23	2017-06-11	8.14	6.42	5	6.81	8.31	7	6.56	9.63	10.62	6.23	2017-06-11	10.83	7.78	8.45	10.36	8.35	7.84	6.01	5.12	6.54	7.67	2017-06-11	12.13	16.23	16.93	19.57	12.8
2017-06-12	4.66	4.7	3.66	3.42	3.19	4.95	5.81	6.22	7.37	4.2	2017-06-12	7.59	7.64	4.54	5.18	4.51	7.06	7.51	5.39	5.54	5.23	2017-06-12	7.69	6.06	4.72	6.42	8.16	7.05	6.59	9.59	10.7	6.28	2017-06-12	10.1	7.34	8.05	9.81	8.19	7.94	6	5.14	6.52	7.64	2017-06-12	11.18	15.1	16.08	19.2	12.74
2017-06-14	6.51	6.85	4.36	3.66	3.37	5.02	5.96	6.32	7.58	4.25	2017-06-14	10.72	10.62	5.21	5.36	4.74	7.66	7.72	5.62	5.53	5.26	2017-06-14	11.02	8.27	5.76	6.49	8.37	7.64	6.64	9.67	10.69	6.28	2017-06-14	14.5	10.49	9.92	11.24	8.5	8.03	6.11	5.12	6.46	7.7	2017-06-14	14.55	19.46	19.52	20.24	13.23
2017-06-15	5.58	6.14	4.16	3.65	3.34	4.97	5.85	6.24	7.47	4.22	2017-06-15	9.33	9.59	5.07	5.29	4.6	7.65	7.69	5.58	5.57	5.27	2017-06-15	9.83	7.71	5.53	7.16	8.31	6.93	6.7	9.82	10.64	6.2	2017-06-15	12.93	9.55	9.64	10.96	8.31	7.88	6.07	5.02	6.53	7.6	2017-06-15	13.11	18.18	18.84	20.38	13.25
2017-06-16	4.99	5.38	3.94	3.58	3.34	5.06	5.99	6.34	7.49	4.24	2017-06-16	8.59	8.53	4.81	5.34	4.65	7.75	7.52	5.66	5.66	5.29	2017-06-16	8.83	7.03	5.16	6.61	8.26	7.26	6.69	9.71	10.79	6.29	2017-06-16	11.62	8.83	9.35	10.73	8.33	7.98	6.06	5.15	6.55	7.65	2017-06-16	12.15	17	18.16	20.3	13.14
2017-06-18	5.71	5.28	3.75	3.45	3.28	4.96	5.98	6.33	7.54	4.26	2017-06-18	9.56	8.95	4.55	5.16	4.74	7.3	7.78	5.91	5.61	5.28	2017-06-18	9.92	7.04	4.99	6.58	8.32	7.25	6.7	9.72	10.76	6.32	2017-06-18	13.07	9.49	9.25	10.22	8.4	8.01	6.07	5.19	6.53	7.65	2017-06-18	13.36	16.96	17.24	19.92	13.13
2017-06-19	4.96	4.98	3.74	3.44	3.27	4.89	5.88	6.3	7.38	4.22	2017-06-19	8.4	8.26	4.49	5.02	4.55	7.63	7.66	5.63	5.61	5.27	2017-06-19	8.54	6.62	4.83	6.6	8.21	7.14	6.71	9.76	10.71	6.28	2017-06-19	11.93	8.7	8.89	10.17	8.37	7.97	6.09	5.1	6.51	7.64	2017-06-19	12.16	16	16.82	19.75	13.2
2017-06-20	6.87	6.15	3.66	3.39	3.26	4.99	5.91	6.34	7.51	4.25	2017-06-20	11.86	10.74	5.08	5.06	4.54	7.61	7.72	5.68	5.66	5.32	2017-06-20	11.9	8.03	4.83	6.57	8.23	7.28	6.76	9.7	10.74	6.35	2017-06-20	15.16	11.17	10.58	10.47	8.4	8.02	6.15	5.18	6.54	7.68	2017-06-20	15.69	20.14	18.44	19.71	13.13
2017-06-21	5.88	5.75	3.69	3.47	3.34	5.12	6.08	6.42	7.6	4.24	2017-06-21	10	9.74	5.07	5.12	4.58	7.74	7.81	5.74	5.68	5.38	2017-06-21	10.24	7.49	4.84	6.46	8.21	7.3	6.75	9.7	10.64	6.32	2017-06-21	13.53	10.13	9.83	10.88	8.5	7.99	6.14	5.15	6.41	7.6	2017-06-21	14.08	19.04	18.77	20.16	13.27
2017-06-23	5.03	5.08	3.64	3.37	3.22	4.94	5.86	6.32	7.51	4.27	2017-06-23	8.48	8.53	4.76	5.02	4.52	7.64	7.76	5.69	5.59	5.29	2017-06-23	8.84	6.81	4.74	6.4	8.1	7.19	6.72	9.74	10.77	6.32	2017-06-23	12.48	9.21	9.41	10.67	8.63	8.04	6.16	5.13	6.58	7.7	2017-06-23	12.56	16.89	17.87	19.91	13.17
2017-06-24	4.74	4.74	3.57	3.32	3.18	4.94	5.88	6.36	7.51	4.27	2017-06-24	8	8.01	4.58	4.98	4.49	7.54	7.69	5.64	5.55	5.34	2017-06-24	8.03	6.44	4.69	6.37	8.12	7.22	6.77	9.7	10.78	6.35	2017-06-24	11.71	8.56	9.11	10.66	8.6	8.03	6.06	5.12	6.6	7.68	2017-06-24	11.28	15.52	16.88	19.85	13.12
2017-06-26	4.29	4.53	3.51	3.28	3.22	4.92	5.99	6.37	7.54	4.3	2017-06-26	7.33	7.41	4.39	4.87	4.45	7.57	7.76	5.64	5.58	5.32	2017-06-26	7.32	6.1	4.65	6.24	8.02	7.17	6.66	9.69	10.78	6.32	2017-06-26	10.43	7.55	8.35	10.11	8.68	8.09	6.1	5.16	6.58	7.72	2017-06-26	9.92	13.93	15.48	19.35	13.08
2017-06-27	4.17	4.42	3.49	3.29	3.2	4.94	5.93	6.35	7.5	4.26	2017-06-27	6.97	7.14	4.26	4.89	4.57	7.49	7.63	5.64	5.6	5.33	2017-06-27	7.08	5.91	4.56	6.29	7.99	7.12	6.58	9.57	10.73	6.31	2017-06-27	9.79	7.2	8.06	9.95	8.56	7.99	6.09	5.13	6.57	7.7	2017-06-27	9.83	12.93	14.54	18.77	12.96
2017-06-28	3.96	4.3	3.45	3.37	3.23	4.69	5.97	6.31	7.49	4.3	2017-06-28	6.66	7.02	4.43	4.73	4.65	7.49	7.71	5.74	5.94	5.83	2017-06-28	6.96	6	4.55	6.03	8.18	7.06	6.76	9.73	10.69	6.14	2017-06-28	9.78	6.99	7.87	9.54	8.47	8.02	6.13	5.2	6.62	7.74	2017-06-28	9.08	12.33	13.46	18.05	12.69
2017-06-30	3.72	4.15	3.35	3.2	3.1	4.79	5.59	6.36	7.08	4.24	2017-06-30	6.5	6.82	4.05	4.65	4.19	7.3	7.49	5.57	5.58	5.3	2017-06-30	6.45	5.59	4.33	6	7.74	6.94	6.53	9.51	10.5	6.11	2017-06-30	8.85	6.63	7.4	9.32	8.3	7.89	5.97	5.02	6.46	7.59	2017-06-30	8.43	11.68	12.99	17.57	12.38
2017-07-04	4.21	4.17	3.35	3.23	3.18	4.83	5.87	6.29	7.41	4.27	2017-07-04	7.29	6.72	4.02	4.64	4.29	7.44	7.57	5.64	5.61	5.33	2017-07-04	6.98	5.68	4.36	6.11	7.87	6.99	6.6	9.58	10.57	6.14	2017-07-04	9.85	6.52	7.29	8.96	8.13	7.92	6.02	5.12	6.59	7.7	2017-07-04	9.12	11.45	12.39	16.95	12.18
2017-07-05	4	4.07	3.29	3.18	3.15	4.92	5.86	6.26	7.41	4.3	2017-07-05	7.03	6.79	4.09	4.62	4.25	7.45	7.59	5.7	5.67	5.38	2017-07-05	6.75	5.67	4.4	6.11	7.79	7	6.58	9.53	10.59	6.16	2017-07-05	9.44	6.52	7.31	8.99	7.96	7.87	6	5.04	6.56	7.62	2017-07-05	9.14	11.56	12.4	16.84	12.12
2017-07-07	3.53	4.14	3.35	3.21	3.15	4.87	5.85	6.26	7.41	4.29	2017-07-07	6.83	6.7	4.04	4.66	4.37	7.55	7.65	5.62	5.69	5.32	2017-07-07	6.61	5.59	4.38	6.06	7.85	7.02	6.59	9.6	10.58	6.16	2017-07-07	9.14	6.36	7.15	9	8.13	7.96	6.01	5.09	6.56	7.7	2017-07-07	8.7	11.37	12.25	16.78	12.19
2017-07-08	3.81	4.09	3.32	3.13	3.17	4.84	5.82	6.26	7.39	4.25	2017-07-08	6.79	6.71	4.02	4.65	4.39	7.48	7.59	5.69	5.74	5.42	2017-07-08	6.64	5.66	4.32	6.06	7.77	6.95	6.61	9.64	10.59	6.13	2017-07-08	8.88	6.39	7.11	8.85	7.89	7.88	6	5.07	6.58	7.64	2017-07-08	8.6	11.35	12.11	16.48	12.1
2017-07-09	3.76	4.04	3.28	3.12	3.1	4.79	5.76	6.24	7.42	4.29	2017-07-09	6.42	6.5	3.93	4.58	4.33	7.44	7.62	5.69	5.68	5.39	2017-07-09	6.34	5.51	4.27	5.99	7.72	6.86	6.53	9.53	10.56	6.08	2017-07-09	8.53	6.13	7.06	8.63	7.77	7.77	5.91	5.04	6.51	7.65	2017-07-09	8.26	11.24	11.89	16.59	12.03
2017-07-10	3.82	4.11	3.33	3.15	3.09	4.89	5.71	6.21	7.36	4.33	2017-07-10	6.43	6.74	3.99	4.59	4.25	7.43	7.59	5.64	5.6	5.38	2017-07-10	6.42	5.54	4.26	5.94	7.58	6.86	6.58	9.53	10.55	6.12	2017-07-10	8.45	6.11	6.96	8.72	7.79	7.83	5.95	5.14	6.55	7.66	2017-07-10	8.17	11.09	11.95	16.28	12.04
2017-07-11	3.59	4	3.26	3.08	3.13	4.82	5.77	6.39	7.37	4.31	2017-07-11	6.26	6.63	3.98	4.57	4.28	7.35	7.56	5.71	5.72	5.39	2017-07-11	6.39	5.54	4.32	5.96	7.65	6.86	6.47	9.52	10.53	6.11	2017-07-11	8.24	6.15	7.03	8.71	7.77	7.77	5.94	4.97	6.58	7.64	2017-07-11	8.19	11.07	11.71	15.93	11.8
2017-07-12	3.52	4.02	3.28	3.11	3.13	4.76	5.87	6.26	7.33	4.22	2017-07-12	6.03	6.59	3.95	4.56	4.27	7.31	7.43	5.65	5.67	5.36	2017-07-12	6.13	5.44	4.21	5.9	7.66	6.92	6.52	9.46	10.54	6.01	2017-07-12	8.16	5.94	6.83	8.57	7.76	7.77	5.95	4.94	6.56	7.59	2017-07-12	8.06	10.87	11.62	15.84	11.89
2017-07-13	3.55	4.05	3.32	3.11	3.09	4.77	5.75	6.24	7.38	4.3	2017-07-13	6.02	6.54	3.91	4.48	4.27	7.3	7.52	5.67	5.69	5.31	2017-07-13	6.03	5.43	4.24	5.86	7.59	6.77	6.48	9.47	10.53	6.07	2017-07-13	7.77	5.99	6.78	8.56	7.77	7.76	5.99	5.01	6.6	7.59	2017-07-13	7.97	10.97	11.7	16.02	11.84
2017-07-14	3.38	3.93	3.21	3.06	3.08	4.82	5.76	6.38	7.28	4.24	2017-07-14	5.82	6.5	3.89	4.44	4.12	7.24	7.46	5.64	5.62	5.34	2017-07-14	6.05	5.39	4.17	5.9	7.59	6.82	6.44	9.41	10.45	5.99	2017-07-14	7.62	5.89	6.79	8.49	7.71	7.7	5.82	4.97	6.41	7.49	2017-07-14	7.49	10.82	11.49	15.67	11.77
2017-07-15	3.32	3.92	3.2	3.02	3.01	4.64	5.67	6.12	7.17	4.16	2017-07-15	5.64	6.36	3.77	4.37	4.15	7.23	7.42	5.61	5.6	5.3	2017-07-15	6.03	5.4	4.13	5.84	7.51	6.77	6.39	9.35	10.31	5.91	2017-07-15	7.69	5.84	6.67	8.35	7.71	7.57	5.91	4.89	6.48	7.55	2017-07-15	7.67	10.79	11.42	15.62	11.74
2017-07-18	6.6	7.25	5.45	5.11	4.6	7.73	8.89	7.7	8.74	4.64	2017-07-18	10.67	10.68	6.36	8.05	7.15	10.43	9.64	6.78	7.03	6.19	2017-07-18	11.03	8.65	6.68	9.51	11.55	9.41	8.12	11.4	12.25	6.58	2017-07-18	13.96	10.48	11.3	14.36	10.4	9.31	6.4	5.46	6.81	8.46	2017-07-18	14.86	21.73	22.8	26.82	15.91
2017-07-19	5.53	6.03	4.82	4.68	4.35	7.27	8.23	7.68	8.55	4.66	2017-07-19	9.11	9.33	5.87	7.52	6.84	10.51	9.8	6.8	6.99	6.33	2017-07-19	9.46	7.54	6.04	8.87	10.85	9.21	8.1	11.42	12.28	6.7	2017-07-19	12.44	9.46	10.58	13.41	10.63	9.51	6.56	5.53	7.17	8.48	2017-07-19	14.52	20.99	21.86	26.39	16.15
2017-07-22	4.6	4.8	3.95	3.86	3.72	6.26	7.13	7.27	8.18	4.54	2017-07-22	7.94	7.78	4.99	6.25	5.91	9.83	9.53	6.77	6.95	6.25	2017-07-22	7.97	6.46	5.22	7.72	10.06	8.81	8.06	11.29	12.17	6.73	2017-07-22	10.99	8.38	9.31	11.97	10.2	9.65	6.65	5.53	7.19	8.43	2017-07-22	13.47	19.24	20.52	25.42	16.47
2017-07-23	4.4	4.55	3.8	3.69	3.63	6.07	6.9	7.3	8.21	4.58	2017-07-23	7.54	7.41	4.76	5.96	5.66	9.65	9.38	6.73	6.94	6.22	2017-07-23	7.59	6.24	5.03	7.48	9.74	8.67	7.91	11.14	12.09	6.73	2017-07-23	10.71	7.99	8.94	11.47	10.11	9.55	6.64	5.48	7.16	8.43	2017-07-23	12.82	18.76	19.98	25.58	16.53
2017-07-24	4.23	4.49	3.67	3.61	3.59	6.03	6.88	7.36	8.22	4.64	2017-07-24	7.52	7.5	4.7	5.83	5.45	9.36	9.35	6.7	6.88	6.34	2017-07-24	7.38	6.18	4.99	7.31	9.67	8.58	7.83	11.06	12.05	6.78	2017-07-24	10.2	7.69	8.67	11.07	9.89	9.52	6.68	5.53	7.26	8.48	2017-07-24	12.45	18.06	19.5	24.7	16.37
2017-07-25	4.2	4.5	3.69	3.52	3.48	5.63	6.49	7.13	8.04	4.63	2017-07-25	7.31	7.16	4.52	5.54	5.19	9.11	9.02	6.67	6.95	6.24	2017-07-25	7.27	6.09	4.83	7.09	9.31	8.34	7.78	11.03	11.96	6.75	2017-07-25	9.98	7.34	8.51	10.67	9.63	9.29	6.62	5.49	7.29	8.47	2017-07-25	11.98	17.45	19	24.42	16.13
2017-07-26	4.08	4.38	3.6	3.43	3.41	5.45	6.33	7.04	7.95	4.57	2017-07-26	6.97	7.09	4.4	5.33	5.02	8.85	8.97	6.6	6.8	6.28	2017-07-26	6.97	5.9	4.71	6.84	9.08	8.27	7.66	10.91	11.98	6.72	2017-07-26	9.74	7.13	8.13	10.43	9.41	9.24	6.59	5.56	7.15	8.44	2017-07-26	11.37	16.59	18.26	23.71	15.99
2017-07-27	3.95	4.33	3.55	3.42	3.38	5.38	6.32	6.96	7.99	4.58	2017-07-27	6.83	6.94	4.3	5.17	4.86	8.67	8.83	6.56	6.71	6.24	2017-07-27	6.84	5.79	4.68	6.66	8.9	8.08	7.64	10.9	11.85	6.72	2017-07-27	9.41	6.96	8.07	10.05	9.17	9.07	6.56	5.52	7.17	8.37	2017-07-27	10.45	15.77	17.47	23.3	15.64
2017-07-28	3.78	4.27	3.52	3.32	3.34	5.32	6.19	6.89	7.87	4.54	2017-07-28	6.48	6.86	4.23	5.01	4.75	8.53	8.72	6.51	6.69	6.16	2017-07-28	6.72	5.77	4.56	6.6	8.78	8.04	7.55	10.73	11.76	6.66	2017-07-28	8.98	6.82	7.7	9.82	9.03	8.91	6.52	5.47	7.13	8.3	2017-07-28	10.35	15.15	16.95	22.65	15.53
2017-07-29	3.73	4.23	3.48	3.3	3.31	5.21	6.12	6.77	7.75	4.45	2017-07-29	6.44	6.77	4.22	5.02	4.74	8.41	8.54	6.38	6.58	6.14	2017-07-29	6.59	5.75	4.56	6.42	8.6	7.89	7.35	10.59	11.68	6.61	2017-07-29	8.92	6.63	7.7	9.69	8.84	8.79	6.46	5.41	7.06	8.27	2017-07-29	10.06	14.43	16.19	22.11	15.1
2017-07-30	7.28	7.89	4.94	4.08	3.41	5.25	6.14	6.86	7.81	4.49	2017-07-30	12.13	11.72	5.89	5.91	4.85	8.61	8.68	6.54	6.66	6.16	2017-07-30	12.2	9.57	6.69	8.18	9.46	8.05	7.55	13.98	11.73	6.57	2017-07-30	15.13	11.22	10.75	11.33	9.01	8.89	6.45	5.4	7.03	8.28	2017-07-30	17.62	22.52	22.8	25.56	16.08
2017-08-01	5.24	5.73	4.29	3.7	3.41	5.23	6.18	6.82	7.84	4.56	2017-08-01	8.83	9.15	5.39	6.02	4.9	8.68	8.79	6.68	6.78	6.23	2017-08-01	9.23	7.4	5.71	7.6	9.57	8.3	7.64	10.83	11.77	6.6	2017-08-01	12.29	9.3	10.01	11.68	9.39	8.99	6.51	5.42	7.06	8.26	2017-08-01	13.55	19.68	20.69	25.8	16.29
2017-08-02	4.94	5.3	4.06	3.56	3.38	5.22	6.24	6.91	7.88	4.55	2017-08-02	8.24	8.39	5.16	5.91	4.96	8.66	8.66	6.66	6.7	6.12	2017-08-02	8.34	6.82	5.44	7.29	9.38	8.3	7.63	10.74	11.79	6.63	2017-08-02	11.43	8.93	9.67	11.46	9.4	9.08	6.55	5.44	7.21	8.36	2017-08-02	12.93	18.62	19.89	25.08	16.27
2017-08-05	4.33	4.57	3.68	3.43	3.28	5.1	6.08	6.73	7.81	4.57	2017-08-05	7.49	7.39	4.54	5.37	4.81	8.33	8.46	6.53	6.64	6.17	2017-08-05	7.35	6.16	4.93	6.99	9.08	8.1	7.53	10.8	11.71	6.56	2017-08-05	10.37	7.74	8.74	10.53	9.05	9.11	6.46	5.45	7.09	8.27	2017-08-05	11.94	16.81	18.38	23.71	15.8
2017-08-06	4.09	4.49	3.62	3.26	3.29	5.11	5.99	6.78	7.58	4.5	2017-08-06	7.18	7.26	4.44	5.18	4.62	8.21	8.43	6.51	6.6	6.08	2017-08-06	6.99	5.86	4.67	6.94	8.92	7.74	7.5	10.79	11.48	6.48	2017-08-06	9.83	7.28	8.15	10.15	9.18	8.96	6.5	5.39	6.97	8.12	2017-08-06	11.05	15.83	17.41	23.04	15.51
2017-08-07	4.18	4.37	3.56	3.31	3.28	5.03	5.99	6.6	7.71	4.53	2017-08-07	6.76	6.98	4.26	5.03	4.66	8.09	8.28	6.34	6.44	6.01	2017-08-07	7.04	5.89	4.62	6.55	8.64	7.85	7.3	10.43	11.45	6.43	2017-08-07	9.59	7.18	7.99	10	8.86	8.84	6.39	5.34	6.92	8.12	2017-08-07	10.5	14.87	16.6	22.29	15.34
2017-08-08	3.93	4.36	3.53	3.29	3.2	5.05	5.92	6.55	7.61	4.51	2017-08-08	6.74	6.9	4.26	4.98	4.59	7.91	8.14	6.28	6.42	5.95	2017-08-08	6.72	5.7	4.53	6.36	8.58	7.8	7.26	10.31	11.42	6.43	2017-08-08	9.15	6.83	7.85	9.76	8.78	8.66	6.33	5.36	6.9	8.08	2017-08-08	9.92	14.1	15.97	21.79	14.97
2017-08-09	3.85	4.28	3.49	3.27	3.2	4.94	5.89	6.48	7.58	4.47	2017-08-09	6.6	6.73	4.16	4.91	4.57	7.97	8.19	6.34	6.48	5.98	2017-08-09	6.55	5.65	4.46	6.41	8.46	7.74	7.23	10.37	11.43	6.42	2017-08-09	8.98	6.6	7.39	9.7	8.59	8.79	6.3	5.29	6.89	8.09	2017-08-09	9.81	13.7	15.3	21.28	14.82
2017-08-10	4.86	4.23	3.46	3.21	3.2	4.94	5.83	6.5	7.58	4.49	2017-08-10	8.14	6.79	4.11	4.84	4.55	7.89	8.08	6.29	6.39	5.91	2017-08-10	7.96	5.7	4.47	6.31	8.4	7.7	7.17	10.23	11.31	6.35	2017-08-10	11.15	7.01	7.72	9.54	8.61	8.69	6.33	5.2	6.89	8.03	2017-08-10	12.07	13.83	15.14	20.8	14.49
2017-08-11	4.5	4.24	3.42	3.19	3.14	4.81	5.83	6.43	7.53	4.43	2017-08-11	7.63	6.7	4.12	4.76	4.35	7.89	8.05	6.1	6.41	5.95	2017-08-11	7.39	5.65	4.46	6.24	8.29	7.53	7.11	10.24	11.25	6.31	2017-08-11	10.35	7.07	7.53	9.38	8.47	8.63	6.25	5.18	6.91	7.99	2017-08-11	11.12	13.51	14.69	20.36	14.33
2017-08-12	4.22	4.19	3.4	3.21	3.16	4.88	5.84	6.43	7.5	4.38	2017-08-12	7.29	6.76	4.09	4.76	4.43	7.66	7.97	6.23	6.34	5.95	2017-08-12	7.07	5.65	4.41	5.84	8.25	7.52	6.99	10.02	11.16	6.27	2017-08-12	9.55	6.8	7.57	9.33	8.52	8.54	6.16	5.15	6.77	7.91	2017-08-12	10.38	13.1	14.15	19.76	14.11
2017-08-14	4.36	4.14	3.43	3.18	3.11	4.81	5.77	6.39	7.44	4.44	2017-08-14	7.78	6.69	4.1	4.74	4.33	7.63	7.92	6.22	6.34	5.95	2017-08-14	7	5.58	4.39	6.16	8.12	7.44	7.01	10.08	11.13	6.31	2017-08-14	10.1	6.85	7.41	9.29	8.43	8.48	6.15	5.17	6.75	7.93	2017-08-14	10.91	12.95	13.98	19.37	13.97
2017-08-15	4.21	4.13	3.35	3.18	3.13	4.81	5.79	6.39	7.53	4.43	2017-08-15	7.49	6.53	3.96	4.73	4.4	7.67	7.78	6.23	6.47	5.9	2017-08-15	6.98	5.6	4.36	5.87	8.11	7.41	6.97	10.04	11.1	6.21	2017-08-15	8.93	6.64	6.23	8.71	7.73	8.44	6.27	5.21	6.8	7.9	2017-08-15	10.3	12.84	13.76	19.2	13.74
2017-08-16	4.01	4.11	3.4	3.18	3.22	4.95	5.81	6.52	7.48	4.43	2017-08-16	7.22	6.64	3.99	4.67	4.39	7.63	7.87	6.12	6.29	5.89	2017-08-16	6.72	5.55	4.35	6.08	8.17	7.35	6.96	10.05	11.17	6.24	2017-08-16	8.59	6.56	6.19	8.79	7.76	8.49	6.21	5.21	6.81	7.98	2017-08-16	9.73	12.59	13.59	18.97	13.69
2017-08-17	3.94	4.14	3.31	3.13	3.1	4.82	5.71	6.3	7.4	4.41	2017-08-17	6.93	6.52	4.02	4.64	4.34	7.56	7.85	6.09	6.3	5.88	2017-08-17	6.63	5.47	4.29	6	8.03	7.31	6.87	9.89	10.95	6.17	2017-08-17	8.43	6.46	6.26	8.64	7.64	8.4	6.16	5.17	6.7	7.91	2017-08-17	9.4	12.46	13.37	18.72	13.39
2017-08-18	3.74	4.02	3.28	3.08	3.08	4.74	5.68	6.28	7.4	4.42	2017-08-18	6.66	6.47	3.92	4.56	4.25	7.51	7.84	6.05	6.2	5.82	2017-08-18	6.49	5.55	4.35	6.04	7.99	7.3	6.85	9.94	10.95	6.14	2017-08-18	8.28	6.45	6.18	8.72	7.7	8.39	6.16	5.18	6.67	7.87	2017-08-18	9.11	12.09	13.11	18.33	13.24
2017-08-19	3.67	4.02	3.32	3.14	3.12	4.78	5.7	6.23	7.38	4.38	2017-08-19	6.68	6.42	3.89	4.56	4.26	7.47	7.72	6.09	6.1	5.84	2017-08-19	6.28	5.44	4.27	5.95	8.06	7.32	6.82	9.8	10.91	6.15	2017-08-19	8.17	6.36	6.1	8.59	7.57	8.32	6.12	5.16	6.64	7.8	2017-08-19	8.84	11.89	12.89	17.98	13.18
2017-08-20	3.7	4.1	3.39	3.2	3.16	4.79	5.78	6.3	7.4	4.4	2017-08-20	6.57	6.37	3.93	4.66	4.44	7.67	7.74	6.34	6.36	5.8	2017-08-20	6.28	5.48	4.32	6.02	8.04	7.3	6.9	9.86	10.93	6.17	2017-08-20	8.23	6.38	6.18	8.67	7.68	8.38	6.15	5.13	6.71	7.87	2017-08-20	8.96	11.62	12.82	17.6	13.12
[truncated: 5 more columns]

## Sheet: LWC(compated LGM)
M. sativa	CL1	CL2	CL3	CL4	CL5	R. pseudoacacia	CL1	CL2	CL3	CL4	CL5	P. orientalis	CL1	CL2	CL3	CL4	CL5
2014-04-15	4.59	4.34	4.04	3.85	3.21	2014-04-26	2.82	4.6	4.08	7.93	5.44	2014-05-29	1.77	1.88	1.79	1.88	1.76
2014-04-26	3.68	2.19	2.12	0.56	0.76	2014-05-05	2.51	2.51	2.35	2.28	2.13	2014-06-09	1.89	2.11	2.04	2.03	2.02
2014-05-05	3.4	3.26	2.86	2.56	2.12	2014-05-15	2.24	2.29	2.25	2.09	2.07	2014-06-23	2.38	2.34	2.26	2.33	2.24
2014-06-05	3.64	3.74	3.79	2.87	2.58	2014-05-25	2.15	2.11	2.08	2.08	1.94	2014-07-08	1.8	2	1.73	1.75	1.63
2014-06-19	4.07	4.48	2.78	3.57	3.37	2014-06-07	2.06	2.01	2.14	1.92	1.88	2014-07-15	1.5	1.57	1.46	1.31	1.13
2014-07-01	3.84	4.15	3.79	3.41	2.47	2014-07-04	2.36	2.28	3.25	2.22	2.17	2014-07-27	1.32	2.11	2.14	1.8	2.37
2014-07-13	3.59	3.61	3.43	2.96	2.1	2014-07-11	2.19	2.31	1.98	1.87	1.5	2014-08-06	2.09	2.14	2.11	2.25	2.27
2014-07-27	3.71	3.58	4.35	3.87	1.3	2014-07-25	2.9	2.27	2.21	2	1.43	2014-08-15	1.92	1.91	1.86	1.96	1.98
2014-08-06	4.63	4.8	4.71	4.05	3.76	2014-08-06	2.17	2.19	2.12	2.01	2.18	2014-08-25	1.76	1.75	1.7	1.7	1.86
2014-08-15	3.89	4.19	4.17	3.56	2.83	2014-08-15	2.05	2.01	1.86	1.69	1.75
2014-08-25	4.02	3.94	3.74	3.85	2.82	2014-08-25	1.82	1.9	1.78	1.71	1.77

## Sheet: Plant growth(LGM)
Height（cm）					Aboveground biomass（g）
L1	L2	L3	L4	L5	L1			L2			L3			L4			L5
28	44	37	37	10	Biomass	number	per plant	Biomass	number	per plant	Biomass	number	per plant	Biomass	number	per plant	Biomass	number	per plant
27	34	33	26	20	4.81	5	0.962	1.98	3	0.66	6.03	3	2.01	4.54	5	0.908	0.639	5	0.128
27	18	40	37	17	1.75	5	0.35	4.86	3	1.62	4.8	3	1.6	3.55	5	0.71	0.675	5	0.135
31	19	27	18	11.5	4.83	5	0.966	1.59	3	0.53	6.2	3	2.067	5.67	5	1.134	1.256	5	0.251
17	35	45	27	7.5				4.46	3	1.487	10.09	3	3.363
17.5	28	38	35	13				0.99	2	0.495	3.4	3	1.133
29	25	30	15	16
29	22	30.5	30	17
21	25	42	24	10
25	26	45	20	7
20	21	35	21	8
10	18	33	23	9
18	14	29.5	22	6
15	15	31	26	8.5
16		23.5	25	6

## Sheet: Plant growth (compacted LGM)
Species	Height/cm	Diameter/cm	Plot	Year		Species	Height/cm	Diameter/cm	Plot	Year
R. pseudoacacia	330	3.782	CL1	2013		P. orientalis	5.5	0.95	CL1	2013
R. pseudoacacia	178	0.764	CL1	2013		P. orientalis	96	1.77	CL1	2013
R. pseudoacacia	174	0.59	CL1	2013		P. orientalis	64.5	1.17	CL1	2013
R. pseudoacacia	191	2.564	CL1	2013		P. orientalis	42.5	0.664	CL1	2013
R. pseudoacacia	200	2.8	CL1	2013		P. orientalis	72.5	0.946	CL1	2013
R. pseudoacacia	155	1.666	CL1	2013		P. orientalis	58.5	0.88	CL1	2013
R. pseudoacacia	277	2.146	CL1	2013		P. orientalis	52.5	0.78	CL1	2013
R. pseudoacacia	130	1.524	CL1	2013		P. orientalis	71	1.2	CL1	2013
R. pseudoacacia	270	2.978	CL1	2013		P. orientalis	34.5	0.674	CL1	2013
R. pseudoacacia	218	2.276	CL1	2013		P. orientalis	66	1.018	CL1	2013
R. pseudoacacia	200	3.146	CL1	2013		P. orientalis	54.5	0.632	CL1	2013
R. pseudoacacia	196	2.524	CL1	2013		P. orientalis	42.5	0.7	CL1	2013
R. pseudoacacia	150	1.864	CL1	2013		P. orientalis	52	0.65	CL1	2013
R. pseudoacacia	170	1.8	CL1	2013		P. orientalis	42.5	0.548	CL1	2013
R. pseudoacacia	212	2.634	CL1	2013		P. orientalis	62.5	0.766	CL1	2013
R. pseudoacacia	162	1.442	CL1	2013		P. orientalis	61	0.716	CL1	2013
R. pseudoacacia	170	2.398	CL1	2013		P. orientalis	85	1.456	CL1	2013
R. pseudoacacia	180	1.52	CL1	2013		P. orientalis	34.5	0.594	CL1	2013
R. pseudoacacia	215	1.922	CL1	2013		P. orientalis	58.5	0.658	CL1	2013
R. pseudoacacia	245	2.532	CL1	2013		P. orientalis	58.5	0.8	CL1	2013
R. pseudoacacia	215	2.15	CL1	2013		P. orientalis	78	0.724	CL1	2013
R. pseudoacacia	178	2.228	CL1	2013		P. orientalis	44	0.646	CL1	2013
R. pseudoacacia	180	2.736	CL1	2013		P. orientalis	60.5	0.536	CL1	2013
R. pseudoacacia	200	2.894	CL1	2013		P. orientalis	48	1.238	CL1	2013
R. pseudoacacia	215	3.14	CL1	2013		P. orientalis	80	1.09	CL1	2013
R. pseudoacacia	210	2.09	CL1	2013		P. orientalis	89.5	1.06	CL1	2013
R. pseudoacacia	248	3.49	CL1	2013		P. orientalis	47.5	0.45	CL1	2013
R. pseudoacacia	80	1.286	CL1	2013		P. orientalis	52		CL1	2013
R. pseudoacacia	290	3.184	CL1	2013		P. orientalis	48	0.58	CL1	2013
R. pseudoacacia	160	2.05	CL1	2013		P. orientalis	61	0.63	CL1	2013
R. pseudoacacia	233	3	CL1	2013		P. orientalis	56	0.76	CL1	2013
R. pseudoacacia	240	3.148	CL1	2013		P. orientalis	64	0.886	CL1	2013
R. pseudoacacia	99	1.484	CL1	2013		P. orientalis	71.5	1.01	CL1	2013
R. pseudoacacia	255	3.828	CL2	2013		P. orientalis	68	0.888	CL1	2013
R. pseudoacacia	265	3.452	CL2	2013		P. orientalis	42.5	0.486	CL1	2013
R. pseudoacacia	149	1.716	CL2	2013		P. orientalis	66	1.214	CL1	2013
R. pseudoacacia	88	1.652	CL2	2013		P. orientalis	46	0.42	CL1	2013
R. pseudoacacia	150	1.666	CL2	2013		P. orientalis	55	0.766	CL1	2013
R. pseudoacacia	150	1.61	CL2	2013		P. orientalis	63.5	1.14	CL1	2013
R. pseudoacacia	177	2.124	CL2	2013		P. orientalis	68.5	1.116	CL1	2013
R. pseudoacacia	245	3.288	CL2	2013		P. orientalis	77	1.054	CL1	2013
R. pseudoacacia	200	1.94	CL2	2013		P. orientalis	40.5	0.536	CL1	2013
R. pseudoacacia	175	1.884	CL2	2013		P. orientalis	42.5	0.77	CL1	2013
R. pseudoacacia	158	1.89	CL2	2013		P. orientalis	47.5	0.486	CL1	2013
R. pseudoacacia	130	2.208	CL2	2013		P. orientalis	26	0.716	CL1	2013
R. pseudoacacia	82	1.68	CL2	2013		P. orientalis	85.5	1.07	CL1	2013
R. pseudoacacia	160	1.6	CL2	2013		P. orientalis	27.5	0.8	CL1	2013
R. pseudoacacia	245	3.418	CL2	2013		P. orientalis	56	0.694	CL1	2013
R. pseudoacacia	80	0.94	CL2	2013		P. orientalis	79	1.394	CL2	2013
R. pseudoacacia	251	3.14	CL2	2013		P. orientalis	72	0.922	CL2	2013
R. pseudoacacia	190	2.184	CL2	2013		P. orientalis	47	0.68	CL2	2013
R. pseudoacacia	325	3.712	CL2	2013		P. orientalis	40	0.628	CL2	2013
R. pseudoacacia	132	1.424	CL2	2013		P. orientalis	92.5	0.958	CL2	2013
R. pseudoacacia	165	2.178	CL2	2013		P. orientalis	94	1.34	CL2	2013
R. pseudoacacia	182	2.124	CL2	2013		P. orientalis	80.5	1.34	CL2	2013
R. pseudoacacia	108	1.188	CL2	2013		P. orientalis	59	0.928	CL2	2013
R. pseudoacacia	272	3.2	CL2	2013		P. orientalis	51.5	1	CL2	2013
R. pseudoacacia	176	2.23	CL2	2013		P. orientalis	51	1.034	CL2	2013
R. pseudoacacia	100	2.412	CL2	2013		P. orientalis	79.5	1	CL2	2013
R. pseudoacacia	172	2.08	CL2	2013		P. orientalis	37	0.7	CL2	2013
R. pseudoacacia	175	2.218	CL2	2013		P. orientalis	62	0.724	CL2	2013
R. pseudoacacia	90	1.482	CL3	2013		P. orientalis	63.5	0.9	CL2	2013
R. pseudoacacia	243	3.13	CL3	2013		P. orientalis	87.5	1.32	CL2	2013
R. pseudoacacia	223	2.826	CL3	2013		P. orientalis	59	0.932	CL2	2013
R. pseudoacacia	187	2.226	CL3	2013		P. orientalis	40	0.574	CL2	2013
R. pseudoacacia	215	2.866	CL3	2013		P. orientalis	38	0.354	CL2	2013
R. pseudoacacia	180	2.334	CL3	2013		P. orientalis	77.5	1.17	CL2	2013
R. pseudoacacia	220	3.616	CL3	2013		P. orientalis	65.5	0.652	CL2	2013
R. pseudoacacia	180	1.9	CL3	2013		P. orientalis	69		CL2	2013
R. pseudoacacia	169	2.45	CL3	2013		P. orientalis	64	0.892	CL2	2013
R. pseudoacacia	217	2.138	CL3	2013		P. orientalis	83.5	1.416	CL2	2013
R. pseudoacacia	168	2.256	CL3	2013		P. orientalis	37	0.612	CL2	2013
R. pseudoacacia	156	1.69	CL3	2013		P. orientalis	58	0.81	CL2	2013
R. pseudoacacia	202	1.672	CL3	2013		P. orientalis	58.5	0.86	CL2	2013
R. pseudoacacia	140	1.648	CL3	2013		P. orientalis	50	0.56	CL2	2013
R. pseudoacacia	100	0.962	CL3	2013		P. orientalis	48.5	0.57	CL2	2013
R. pseudoacacia	110	1.44	CL3	2013		P. orientalis	70.5	0.8	CL2	2013
R. pseudoacacia	250	3.434	CL3	2013		P. orientalis	37	0.59	CL2	2013
R. pseudoacacia	130	2.018	CL3	2013		P. orientalis	58	0.824	CL2	2013
R. pseudoacacia	150	2.04	CL3	2013		P. orientalis	86	0.874	CL2	2013
R. pseudoacacia	255	2.7	CL3	2013		P. orientalis	98	1.5	CL2	2013
R. pseudoacacia	155	1.8	CL3	2013		P. orientalis	63.5	1.02	CL2	2013
R. pseudoacacia	130	1.768	CL3	2013		P. orientalis	52.5	0.58	CL2	2013
R. pseudoacacia	208	3.236	CL3	2013		P. orientalis	78.4	0.99	CL2	2013
R. pseudoacacia	178	2.526	CL3	2013		P. orientalis	54	0.748	CL2	2013
R. pseudoacacia	152	1.91	CL3	2013		P. orientalis	62.5	0.864	CL2	2013
R. pseudoacacia	210	2.336	CL3	2013		P. orientalis	49	0.844	CL2	2013
R. pseudoacacia	110	2.03	CL3	2013		P. orientalis	58.5	1.164	CL2	2013
R. pseudoacacia	224	2.578	CL3	2013		P. orientalis	66	0.966	CL2	2013
R. pseudoacacia	29	0.766	CL4	2013		P. orientalis	70.5	0.68	CL2	2013
R. pseudoacacia	40	0.47	CL4	2013		P. orientalis	43.5	0.63	CL2	2013
R. pseudoacacia	173	2	CL4	2013		P. orientalis	95	1.638	CL2	2013
R. pseudoacacia	150	1.768	CL4	2013		P. orientalis	65	0.928	CL2	2013
R. pseudoacacia	225	2.23	CL4	2013		P. orientalis	59	0.79	CL2	2013
R. pseudoacacia	187	2.354	CL4	2013		P. orientalis	90	0.9	CL2	2013
R. pseudoacacia	84	1.08	CL4	2013		P. orientalis	49	1.04	CL2	2013
R. pseudoacacia	160	2.05	CL4	2013		P. orientalis	110	1.26	CL3	2013
R. pseudoacacia	188	1.878	CL4	2013		P. orientalis	43	0.812	CL3	2013
R. pseudoacacia	200	2.492	CL4	2013		P. orientalis	77	1	CL3	2013
R. pseudoacacia	120	1.352	CL4	2013		P. orientalis	67	0.746	CL3	2013
R. pseudoacacia	210	3	CL4	2013		P. orientalis	76.6	0.655	CL3	2013
R. pseudoacacia	180	2.22	CL4	2013		P. orientalis	81.5	1.35	CL3	2013
R. pseudoacacia	110	1.4	CL5	2013		P. orientalis	55.5	1.038	CL3	2013
R. pseudoacacia	86	1.02	CL5	2013		P. orientalis	73	0.84	CL3	2013
R. pseudoacacia	150	1.828	CL5	2013		P. orientalis	67	0.97	CL3	2013
R. pseudoacacia	68	0.764	CL5	2013		P. orientalis	83	1.146	CL3	2013
R. pseudoacacia	140	1.668	CL5	2013		P. orientalis	36.5	0.4	CL3	2013
R. pseudoacacia	67	0.66	CL5	2013		P. orientalis	75.5	1.172	CL3	2013
R. pseudoacacia	60	0.818	CL5	2013		P. orientalis	46	0.7	CL3	2013
R. pseudoacacia	72	0.738	CL5	2013		P. orientalis	60.5	0.962	CL3	2013
R. pseudoacacia	55	0.62	CL5	2013		P. orientalis	82.5	0.77	CL3	2013
R. pseudoacacia	72	0.738	CL5	2013		P. orientalis	47.5	0.728	CL3	2013
R. pseudoacacia	73	0.874	CL5	2013		P. orientalis	65	0.91	CL3	2013
R. pseudoacacia	46	0.65	CL5	2013		P. orientalis	66	0.68	CL3	2013
R. pseudoacacia	84	1.266	CL5	2013		P. orientalis	47.5	0.748	CL3	2013
R. pseudoacacia	40	0.5	CL5	2013		P. orientalis	45.5	0.618	CL3	2013
R. pseudoacacia	141	1.864	CL5	2013		P. orientalis	79	0.91	CL3	2013
R. pseudoacacia	33	0.336	CL5	2013		P. orientalis	51.5	0.8	CL3	2013
R. pseudoacacia	320	3.08	CL1	2014		P. orientalis	24	0.674	CL3	2013
R. pseudoacacia	450	5.256	CL1	2014		P. orientalis	96	1.08	CL3	2013
R. pseudoacacia	103	1.15	CL1	2014		P. orientalis	45	0.746	CL3	2013
R. pseudoacacia	460	6.55	CL1	2014		P. orientalis	45	0.724	CL3	2013
R. pseudoacacia	415	6.31	CL1	2014		P. orientalis	66	0.7	CL3	2013
R. pseudoacacia	415	3.682	CL1	2014		P. orientalis	57	0.5	CL3	2013
R. pseudoacacia	450	5.57	CL1	2014		P. orientalis	29.5	0.374	CL3	2013
R. pseudoacacia	175	2.018	CL1	2014		P. orientalis	29.5	0.374	CL3	2013
R. pseudoacacia	430	3.776	CL1	2014		P. orientalis	50		CL3	2013
R. pseudoacacia	305	2.806	CL1	2014		P. orientalis	46.5	0.886	CL3	2013
R. pseudoacacia	165	1.63	CL1	2014		P. orientalis	83.5	1.366	CL3	2013
R. pseudoacacia	450	4.018	CL1	2014		P. orientalis	60	0.8	CL3	2013
R. pseudoacacia	225	2.082	CL1	2014		P. orientalis	67.5	0.6	CL3	2013
R. pseudoacacia	185	2.91	CL1	2014		P. orientalis	34		CL3	2013
R. pseudoacacia	358	3.9	CL1	2014		P. orientalis	61	0.61	CL3	2013
R. pseudoacacia	310	4.172	CL1	2014		P. orientalis	35	0.62	CL3	2013
R. pseudoacacia	475	3.53	CL1	2014		P. orientalis	58.5	0.81	CL3	2013
R. pseudoacacia	380	3.968	CL1	2014		P. orientalis	59	0.812	CL3	2013
R. pseudoacacia	425	3.26	CL1	2014		P. orientalis	90	1.334	CL3	2013
R. pseudoacacia	215	2.256	CL1	2014		P. orientalis	66.5	1.038	CL3	2013
R. pseudoacacia	380	4.42	CL1	2014		P. orientalis	82.5	1	CL3	2013
R. pseudoacacia	420	5.334	CL1	2014		P. orientalis	53	1.088	CL3	2013
R. pseudoacacia	380	3.5	CL1	2014		P. orientalis	70	0.834	CL3	2013
R. pseudoacacia	335	4.762	CL1	2014		P. orientalis	56	0.7	CL3	2013
R. pseudoacacia	290	4.542	CL1	2014		P. orientalis	61	1.05	CL3	2013
R. pseudoacacia	260	4.862	CL1	2014		P. orientalis	7.35	1.08	CL3	2013
R. pseudoacacia	250	2.68	CL1	2014		P. orientalis	71.5	1.1	CL3	2013
R. pseudoacacia	380	4.242	CL1	2014		P. orientalis	70.5	0.832	CL3	2013
R. pseudoacacia	380	4.564	CL1	2014		P. orientalis	60.5	0.874	CL3	2013
R. pseudoacacia	365	2.446	CL1	2014		P. orientalis	70.5	0.75	CL4	2013
R. pseudoacacia	530	4.21	CL1	2014		P. orientalis	72.5	1.376	CL4	2013
R. pseudoacacia	85	1.52	CL1	2014		P. orientalis	72.5	1.676	CL4	2013
R. pseudoacacia	170	2.3	CL2	2014		P. orientalis	88	1.3	CL4	2013
R. pseudoacacia	290	2.288	CL2	2014		P. orientalis	43	0.872	CL4	2013
R. pseudoacacia	435	5.9	CL2	2014		P. orientalis	65	1.368	CL4	2013
R. pseudoacacia	410	5.986	CL2	2014		P. orientalis	55	0.614	CL4	2013
R. pseudoacacia	430	6.1	CL2	2014		P. orientalis	61	0.9	CL4	2013
R. pseudoacacia	330	3.246	CL2	2014		P. orientalis	56	0.66	CL4	2013
R. pseudoacacia	175	1.908	CL2	2014		P. orientalis	66.5	0.978	CL4	2013
R. pseudoacacia	175	2.666	CL2	2014		P. orientalis	68.5	1.056	CL4	2013
R. pseudoacacia	190	2.712	CL2	2014		P. orientalis	84	1.024	CL4	2013
R. pseudoacacia	175	2.786	CL2	2014		P. orientalis	76.5	0.846	CL4	2013
R. pseudoacacia	370	2.878	CL2	2014		P. orientalis	66.5	0.58	CL4	2013
R. pseudoacacia	365	3.4	CL2	2014		P. orientalis	51.5	0.638	CL4	2013
R. pseudoacacia	380	5.2	CL2	2014		P. orientalis	41	0.926	CL4	2013
R. pseudoacacia	425	5.25	CL2	2014		P. orientalis	62.5	0.916	CL4	2013
R. pseudoacacia	83	1.082	CL2	2014		P. orientalis	63.5	1.192	CL4	2013
R. pseudoacacia	410	5.246	CL2	2014		P. orientalis	85	1.358	CL4	2013
R. pseudoacacia	270	2.252	CL2	2014		P. orientalis	60	0.868	CL4	2013
R. pseudoacacia	145	1.93	CL2	2014		P. orientalis	20	0.3	CL4	2013
R. pseudoacacia	150	1.6	CL2	2014		P. orientalis	59	0.82	CL4	2013
R. pseudoacacia	120	1.466	CL2	2014		P. orientalis	70	1.1	CL4	2013
R. pseudoacacia	400	3.57	CL2	2014		P. orientalis	73	1.042	CL4	2013
R. pseudoacacia	295	2.326	CL2	2014		P. orientalis	77.5	1.03	CL4	2013
R. pseudoacacia	215	1.728	CL2	2014		P. orientalis	155	1.394	CL4	2013
R. pseudoacacia	385	3.572	CL2	2014		P. orientalis	77.5	1.114	CL4	2013
R. pseudoacacia	530	6.844	CL2	2014		P. orientalis	91.5	1.134	CL4	2013
R. pseudoacacia	195	2.826	CL2	2014		P. orientalis	77	1.106	CL4	2013
R. pseudoacacia	360	4.144	CL2	2014		P. orientalis	40.5	0.53	CL4	2013
R. pseudoacacia	160	3.358	CL2	2014		P. orientalis	64	0.93	CL4	2013
R. pseudoacacia	390	4.292	CL2	2014		P. orientalis	48.5	0.762	CL4	2013
R. pseudoacacia	485	5.226	CL2	2014		P. orientalis	28	0.658	CL4	2013
R. pseudoacacia	420	5.474	CL3	2014		P. orientalis	74.5	1.05	CL4	2013
R. pseudoacacia	415	4.95	CL3	2014		P. orientalis	72	0.928	CL4	2013
R. pseudoacacia	450	3.838	CL3	2014		P. orientalis	70	0.748	CL4	2013
R. pseudoacacia	325	5.148	CL3	2014		P. orientalis	103.5	1.486	CL4	2013
R. pseudoacacia	425	4.932	CL3	2014		P. orientalis	87	1.236	CL4	2013
R. pseudoacacia	275	2.03	CL3	2014		P. orientalis	56.5	0.734	CL4	2013
R. pseudoacacia	350	4.23	CL3	2014		P. orientalis	83	1.262	CL4	2013
R. pseudoacacia	355	3.98	CL3	2014		P. orientalis	90	1.424	CL4	2013
R. pseudoacacia	470	6.6	CL3	2014		P. orientalis	49	0.746	CL4	2013
R. pseudoacacia	150	1.8	CL3	2014		P. orientalis	57.5	0.618	CL4	2013
R. pseudoacacia	185	2.24	CL3	2014		P. orientalis	58.5	1.144	CL4	2013
R. pseudoacacia	400	4.74	CL3	2014		P. orientalis	46	0.638	CL4	2013
R. pseudoacacia	325	2.95	CL3	2014		P. orientalis	80	1.12	CL4	2013
R. pseudoacacia	170	1.7	CL3	2014		P. orientalis	60	0.752	CL4	2013
R. pseudoacacia	115	1.25	CL3	2014		P. orientalis	77.5	1.15	CL4	2013
R. pseudoacacia	180	1.84	CL3	2014		P. orientalis	59	1.284	CL4	2013
R. pseudoacacia	220	2.2	CL3	2014		P. orientalis	48	0.62	CL4	2013
R. pseudoacacia	170	1.9	CL3	2014		P. orientalis	60.5	1.2	CL4	2013
R. pseudoacacia	205	2.2	CL3	2014		P. orientalis	60	0.564	CL4	2013
R. pseudoacacia	190	2.39	CL3	2014		P. orientalis	62	1.282	CL4	2013
R. pseudoacacia	465	5.95	CL3	2014		P. orientalis	86	0.982	CL4	2013
R. pseudoacacia	415	5.628	CL3	2014		P. orientalis	77	1.09	CL5	2013
R. pseudoacacia	165	2.2	CL3	2014		P. orientalis	94	1.308	CL5	2013
R. pseudoacacia	420	4.688	CL3	2014		P. orientalis	95.5	1.128	CL5	2013
R. pseudoacacia	270	3	CL3	2014		P. orientalis	83.5	1	CL5	2013
R. pseudoacacia	370	4.5	CL3	2014		P. orientalis	42.5	0.902	CL5	2013
R. pseudoacacia	430	6.2	CL3	2014		P. orientalis	34.5	0.618	CL5	2013
R. pseudoacacia	235	3.394	CL3	2014		P. orientalis	77	1.214	CL5	2013
R. pseudoacacia	460	4.854	CL3	2014		P. orientalis	44	0.628	CL5	2013
R. pseudoacacia	265	3.08	CL3	2014		P. orientalis	67	1.074	CL5	2013
R. pseudoacacia	105	1.136	CL4	2014		P. orientalis	100	1.318	CL5	2013
R. pseudoacacia	105	1.492	CL4	2014		P. orientalis	70	1.084	CL5	2013
R. pseudoacacia	250	3.17	CL4	2014		P. orientalis	50	0.7	CL5	2013
R. pseudoacacia	300	3.134	CL4	2014		P. orientalis	54.5	0.752	CL5	2013
R. pseudoacacia	360	4.576	CL4	2014		P. orientalis	63	1.09	CL5	2013
R. pseudoacacia	110	1.08	CL4	2014		P. orientalis	69	1.1	CL5	2013
R. pseudoacacia	135	1.764	CL4	2014		P. orientalis	82	1.178	CL5	2013
R. pseudoacacia	260	3.348	CL4	2014		P. orientalis	90	1.266	CL5	2013
R. pseudoacacia	45	0.7	CL4	2014		P. orientalis	67.5	1.138	CL5	2013
R. pseudoacacia	185	3.48	CL4	2014		P. orientalis	79	1.06	CL5	2013
R. pseudoacacia	250	3.87	CL4	2014		P. orientalis	44.5	0.67	CL5	2013
R. pseudoacacia	310	5.85	CL4	2014		P. orientalis	32	0.528	CL5	2013
R. pseudoacacia	200	2.648	CL4	2014		P. orientalis	34	0.44	CL5	2013
R. pseudoacacia	390	5.99	CL4	2014		P. orientalis	53	0.726	CL5	2013
R. pseudoacacia	270	3.732	CL4	2014		P. orientalis	46	0.446	CL5	2013
R. pseudoacacia	55	0.59	CL5	2014		P. orientalis	43	0.826	CL5	2013
R. pseudoacacia	200	2.3	CL5	2014		P. orientalis	64	1.15	CL5	2013
R. pseudoacacia	130	1.6		2014		P. orientalis	103	1.456	CL5	2013
R. pseudoacacia	210	3.074		2014		P. orientalis	50	0.736	CL5	2013
R. pseudoacacia	275	1.648		2014		P. orientalis	61.5	0.788	CL5	2013
R. pseudoacacia	175	2.682		2014		P. orientalis	53	0.75	CL5	2013
R. pseudoacacia	150	2.03		2014		P. orientalis	59	0.85	CL5	2013
R. pseudoacacia	80	1.25		2014		P. orientalis	55.5	0.628	CL5	2013
R. pseudoacacia	105	1.226		2014		P. orientalis	65	0.8	CL5	2013
R. pseudoacacia	90	1.192		2014		P. orientalis	50.5	0.668	CL5	2013
R. pseudoacacia	64	0.92		2014		P. orientalis	59	0.748	CL5	2013
R. pseudoacacia	95	1.256		2014		P. orientalis	55	0.656	CL5	2013
R. pseudoacacia	65	0.722		2014		P. orientalis	52	0.696	CL5	2013
R. pseudoacacia	350	5.15		2014		P. orientalis	40	0.758	CL5	2013
R. pseudoacacia	130	1.546		2014		P. orientalis	84	1.148	CL5	2013
R. pseudoacacia	200	2.66		2014		P. orientalis	64	0.834	CL5	2013
R. pseudoacacia	100	1.35		2014		P. orientalis	28	0.716	CL5	2013
						P. orientalis	63	0.958	CL5	2013
						P. orientalis	61	1.138	CL5	2013
						P. orientalis	40.5	0.9	CL5	2013
						P. orientalis	66	0.84	CL5	2013
						P. orientalis	74.5	0.96	CL5	2013
						P. orientalis	60	1.282	CL5	2013
						P. orientalis	77	1.436	CL5	2013
						P. orientalis	74	1.012	CL5	2013
						P. orientalis	61	0.814	CL5	2013
						P. orientalis	83.5	1.162	CL5	2013
						P. orientalis	112	2	CL1	2014
						P. orientalis	60	1.068	CL1	2014
						P. orientalis	75	1.31	CL1	2014
						P. orientalis	91	1.42	CL1	2014
						P. orientalis	39	0.76	CL1	2014
						P. orientalis	48	0.866	CL1	2014
						P. orientalis	53	1.05	CL1	2014
						P. orientalis	137	2.634	CL1	2014
						P. orientalis	75	1.36	CL1	2014
						P. orientalis	116	2.068	CL1	2014
						P. orientalis	81	0.962	CL1	2014
						P. orientalis	80	1.07	CL1	2014
						P. orientalis	55	0.746	CL1	2014
						P. orientalis	64.5	0.932	CL1	2014
						P. orientalis	48	0.864	CL1	2014
						P. orientalis	57	0.76	CL1	2014
						P. orientalis	90	1.25	CL1	2014
						P. orientalis	29	0.774	CL1	2014
						P. orientalis	66	1.48	CL1	2014
						P. orientalis	77	0.882	CL1	2014
						P. orientalis	57	0.896	CL1	2014
						P. orientalis	102.5	1.1	CL1	2014
						P. orientalis	23	0.608	CL1	2014
						P. orientalis	73	1.29	CL1	2014
						P. orientalis	73	0.934	CL1	2014
						P. orientalis	49	0.918	CL1	2014
						P. orientalis	44	1.076	CL1	2014
						P. orientalis	75	1.188	CL1	2014
						P. orientalis	76.5	0.9	CL1	2014
						P. orientalis	47	0.746	CL1	2014
						P. orientalis	29.5	0.454	CL1	2014
						P. orientalis	64	0.686	CL1	2014
						P. orientalis	62.5	0.74	CL1	2014
						P. orientalis	108	1.36	CL1	2014
						P. orientalis	100	1.532	CL1	2014
						P. orientalis	81	1.334	CL1	2014
						P. orientalis	66	0.944	CL1	2014
						P. orientalis	52.5	0.648	CL1	2014
						P. orientalis	75	0.9	CL1	2014
						P. orientalis	51.5	0.68	CL1	2014
						P. orientalis	97.5	1.184	CL1	2014
						P. orientalis	83	1.76	CL1	2014
						P. orientalis	67	1.09	CL1	2014
						P. orientalis	40	0.924	CL1	2014
						P. orientalis	105	1.598	CL1	2014
						P. orientalis	33	0.388	CL1	2014
						P. orientalis	60	0.67	CL1	2014
						P. orientalis	52	1.02	CL1	2014
						P. orientalis	53.5	0.62	CL1	2014
						P. orientalis	95	1.616	CL1	2014
						P. orientalis	97	1.726	CL1	2014
						P. orientalis	74	1.31	CL2	2014
						P. orientalis	118	1.834	CL2	2014
						P. orientalis	131	1.854	CL2	2014
						P. orientalis	128	1.44	CL2	2014
						P. orientalis	50	0.83	CL2	2014
						P. orientalis	53	0.818	CL2	2014
						P. orientalis	98.5	1.38	CL2	2014
						P. orientalis	104	2.08	CL2	2014
						P. orientalis	73	1.262	CL2	2014
						P. orientalis	88.5	1.276	CL2	2014
						P. orientalis	79	0.952	CL2	2014
						P. orientalis	30	0.6	CL2	2014
						P. orientalis	65	0.894	CL2	2014
						P. orientalis	109	1.59	CL2	2014
						P. orientalis	59	1.174	CL2	2014
						P. orientalis	78	1.15	CL2	2014
						P. orientalis	88	1.124	CL2	2014
						P. orientalis	81.5	0.91	CL2	2014
						P. orientalis	45	0.71	CL2	2014
						P. orientalis	105	0.986	CL2	2014
						P. orientalis	46	0.4	CL2	2014
						P. orientalis	58	0.928	CL2	2014
						P. orientalis	78	1.234	CL2	2014
						P. orientalis	111	1.764	CL2	2014
						P. orientalis	62	0.806	CL2	2014
						P. orientalis	114	1.362	CL2	2014
						P. orientalis	76.5	1.292	CL2	2014
						P. orientalis	99	1.264	CL2	2014
						P. orientalis	63	0.766	CL2	2014
						P. orientalis	64.5	0.7	CL2	2014
						P. orientalis	69	0.86	CL2	2014
						P. orientalis	78	1.124	CL2	2014
						P. orientalis	93	1.64	CL2	2014
						P. orientalis	58.5	1	CL2	2014
						P. orientalis	30	0.458	CL2	2014
						P. orientalis	80	1.118	CL2	2014
						P. orientalis	63	0.664	CL2	2014
						P. orientalis	102	1.162	CL2	2014
						P. orientalis	77	0.776	CL2	2014
						P. orientalis	77	1.362	CL2	2014
						P. orientalis	108	1.738	CL2	2014
						P. orientalis	90	1.544	CL2	2014
						P. orientalis	110	1.35	CL2	2014
						P. orientalis	79.5	0.992	CL2	2014
						P. orientalis	81.5	1.084	CL2	2014
						P. orientalis	130	2.2	CL2	2014
						P. orientalis	58	0.938	CL2	2014
						P. orientalis	99	1.128	CL2	2014
						P. orientalis	85	1.274	CL2	2014
						P. orientalis	76	1.584	CL2	2014
						P. orientalis	77	1.124	CL3	2014
						P. orientalis	103	1.668	CL3	2014
						P. orientalis	100	1.37	CL3	2014
						P. orientalis	57	0.972	CL3	2014
						P. orientalis	120	1.314	CL3	2014
						P. orientalis	95	1.58	CL3	2014
						P. orientalis	88	1.08	CL3	2014
						P. orientalis	95	0.81	CL3	2014
						P. orientalis	151	2.094	CL3	2014
						P. orientalis	68	0.932	CL3	2014
						P. orientalis	98	1.1	CL3	2014
						P. orientalis	66	1.374	CL3	2014
						P. orientalis	60	1.022	CL3	2014
						P. orientalis	114	1.6	CL3	2014
						P. orientalis	70	0.8	CL3	2014
						P. orientalis	52	0.668	CL3	2014
						P. orientalis	120	1.934	CL3	2014
						P. orientalis	90	1.116	CL3	2014
						P. orientalis	55	0.954	CL3	2014
						P. orientalis	118.5	1.164	CL3	2014
						P. orientalis	28	0.484	CL3	2014
						P. orientalis	64	1.014	CL3	2014
						P. orientalis	75	0.71	CL3	2014
						P. orientalis	133.5	1.838	CL3	2014
						P. orientalis	74	1.17	CL3	2014
						P. orientalis	58.5	0.628	CL3	2014
						P. orientalis	65.5	0.7	CL3	2014
						P. orientalis	86	1.066	CL3	2014
						P. orientalis	69	0.884	CL3	2014
						P. orientalis	65.5	1.236	CL3	2014
						P. orientalis	34	0.792	CL3	2014
						P. orientalis	67	1.1	CL3	2014
						P. orientalis	105	1.996	CL3	2014
						P. orientalis	76	1.1	CL3	2014
						P. orientalis	27	0.736	CL3	2014
						P. orientalis	49.5	0.99	CL3	2014
						P. orientalis	80	0.86	CL3	2014
						P. orientalis	33	0.39	CL3	2014
						P. orientalis	82	0.932	CL3	2014
						P. orientalis	106	2.07	CL3	2014
						P. orientalis	139	1.958	CL3	2014
						P. orientalis	92	1.64	CL3	2014
						P. orientalis	87	1.014	CL3	2014
						P. orientalis	93	1.766	CL3	2014
						P. orientalis	93	1.364	CL3	2014
						P. orientalis	88	1.374	CL3	2014
						P. orientalis	80	1.1	CL3	2014
						P. orientalis	92	1.178	CL3	2014
						P. orientalis	77	1.34	CL3	2014
						P. orientalis	98	1.966	CL3	2014
						P. orientalis	120	1.86	CL4	2014
						P. orientalis	85	1.05	CL4	2014
						P. orientalis	100	1.51	CL4	2014
						P. orientalis	84	0.9	CL4	2014
						P. orientalis	105	2.32	CL4	2014
						P. orientalis	70	1.098	CL4	2014
						P. orientalis	151	2.152	CL4	2014
						P. orientalis	130	2.55	CL4	2014
						P. orientalis	119	1.634	CL4	2014
						P. orientalis	109	1.37	CL4	2014
						P. orientalis	118	1.954	CL4	2014
						P. orientalis	142	1.568	CL4	2014
						P. orientalis	110	12.9	CL4	2014
						P. orientalis	87	0.934	CL4	2014
						P. orientalis	76	0.962	CL4	2014
						P. orientalis	62	1.02	CL4	2014
						P. orientalis	119	1.53	CL4	2014
						P. orientalis	122	1.624	CL4	2014
						P. orientalis	150	2.1	CL4	2014
						P. orientalis	139	2.222	CL4	2014
						P. orientalis	146	1.898	CL4	2014
						P. orientalis	119	1.6	CL4	2014
						P. orientalis	108	1.644	CL4	2014
						P. orientalis	29	1.63	CL4	2014
						P. orientalis	100	0.6	CL4	2014
						P. orientalis	97	1.362	CL4	2014
						P. orientalis	158	2.322	CL4	2014
						P. orientalis	115	1.63	CL4	2014
						P. orientalis	54	0.78	CL4	2014
						P. orientalis	92	1.244	CL4	2014
						P. orientalis	77	1.344	CL4	2014
						P. orientalis	42	0.85	CL4	2014
						P. orientalis	127.5	1.6	CL4	2014
						P. orientalis	111	1.476	CL4	2014
						P. orientalis	100	1.208	CL4	2014
						P. orientalis	153	2.17	CL4	2014
						P. orientalis	117	2.224	CL4	2014
						P. orientalis	128	1.7	CL4	2014
						P. orientalis	93	1.276	CL4	2014
						P. orientalis	113	1.648	CL4	2014
						P. orientalis	86	1.416	CL4	2014
						P. orientalis	80	0.692	CL4	2014
						P. orientalis	91	1.032	CL4	2014
						P. orientalis	130	1.8	CL4	2014
						P. orientalis	98	1.2	CL4	2014
						P. orientalis	113	1.934	CL4	2014
						P. orientalis	86	0.97	CL4	2014
						P. orientalis	105	1.472	CL4	2014
						P. orientalis	92	1.658	CL4	2014
						P. orientalis	65	1.068	CL4	2014
						P. orientalis	69	1.066	CL4	2014
						P. orientalis	134	2.15	CL4	2014
						P. orientalis	110.5	2.32	CL4	2014
						P. orientalis	150	1.92	CL5	2014
						P. orientalis	136	1.948	CL5	2014
						P. orientalis	96	1.6	CL5	2014
						P. orientalis	63	1.082	CL5	2014
						P. orientalis	125	1.762	CL5	2014
						P. orientalis	47	0.884	CL5	2014
						P. orientalis	81	1.43	CL5	2014
						P. orientalis	122	1.75	CL5	2014
						P. orientalis	145	1.882	CL5	2014
						P. orientalis	114	1.76	CL5	2014
						P. orientalis	75.5	1.012	CL5	2014
						P. orientalis	120	1.78	CL5	2014
						P. orientalis	122	1.6	CL5	2014
						P. orientalis	98	1.41	CL5	2014
						P. orientalis	107	1.64	CL5	2014
						P. orientalis	86	1.31	CL5	2014
						P. orientalis	113	1.684	CL5	2014
						P. orientalis	122.5	1.636	CL5	2014
						P. orientalis	80	1.3	CL5	2014
						P. orientalis	83	0.824	CL5	2014
						P. orientalis	85	1.32	CL5	2014
						P. orientalis	32	0.4	CL5	2014
						P. orientalis	48	0.948	CL5	2014
						P. orientalis	60	0.88	CL5	2014
						P. orientalis	76	0.97	CL5	2014
						P. orientalis	112	1.67	CL5	2014
						P. orientalis	171	2.14	CL5	2014
						P. orientalis	112	1.69	CL5	2014
						P. orientalis	54.5	0.948	CL5	2014
						P. orientalis	75	1.31	CL5	2014
						P. orientalis	95	1.682	CL5	2014
						P. orientalis	87	1.164	CL5	2014
						P. orientalis	93	1.374	CL5	2014
						P. orientalis	100	1.31	CL5	2014
						P. orientalis	121	1.826	CL5	2014
						P. orientalis	102	1.162	CL5	2014
						P. orientalis	102	1.62	CL5	2014
						P. orientalis	55.5	1.1	CL5	2014
						P. orientalis	105	1.55	CL5	2014
						P. orientalis	141	1.822	CL5	2014
						P. orientalis	68	1.32	CL5	2014
						P. orientalis	85	1.138	CL5	2014
						P. orientalis	90	1.256	CL5	2014
						P. orientalis	97	1.194	CL5	2014
						P. orientalis	86	1.688	CL5	2014
						P. orientalis	138	2.052	CL5	2014
						P. orientalis	106	1.4	CL5	2014
						P. orientalis	126	1.78	CL5	2014
						P. orientalis	134	2.1	CL5	2014
						P. orientalis	100	1.56	CL5	2014
						P. orientalis	118	1.854	CL5	2014
						P. orientalis	111.5	1.52	CL5	2014
						P. orientalis	110	1.69	CL5	2014
